# Supplementary material for: Identification of the X-linked germ cell specific miRNAs (XmiRs) and their functions
Source: PLoS One. 2019 Feb 1;14(2):e0211739. doi: 10.1371/journal.pone.0211739 (PMC6358104; doi:10.1371/journal.pone.0211739)
Supplement: S3 Table — (XLSX) [file pone.0211739.s010.xlsx]

## Sheet: Sheet1
Putative targets of miR-741-3p	Putative targets of miR-871-3p	Putative targets of miR-880-3p	Putative common targets of miR-741-3p and miR-871-3p	Putative common targets of miR-741-3p and miR-880-3p	Putative common targets of miR-871-3p and miR-880-3p	Putative common targets of miR-741-3p, miR-871-3p and miR-880-3p
0610007L01RIK	0610007P14RIK	0610009O20RIK	0610031J06RIK	0610009D07RIK	1110007A13RIK	0610010B08RIK
0610007P08RIK	0610040J01RIK	0910001L09RIK	1110012D08RIK	0610010O12RIK	1110008P14RIK	0610011L14RIK
0610007P22RIK	1110008E08RIK	1100001G20RIK	1110021L09RIK	0610037P05RIK	1110032A13RIK	1110012J17RIK
0610010K14RIK	1110008F13RIK	1110001A16RIK	1110054O05RIK	1110002L01RIK	1110051M20RIK	1110018G07RIK
0610011F06RIK	1110015M06RIK	1110002B05RIK	1110065P20RIK	1110008J03RIK	1300018I17RIK	1110038D17RIK
0610030E20RIK	1110032A03RIK	1110004F10RIK	1300002K09RIK	1110028C15RIK	1500010J02RIK	1110049F12RIK
0610040B10RIK	1200011M11RIK	1110012L19RIK	1500003O03RIK	1110031I02RIK	1700010M22RIK	1200014J11RIK
1110017F19RIK	1500035H01RIK	1110017D15RIK	1600012H06RIK	1110032A04RIK	1700018A04RIK	1200016B10RIK
1110036O03RIK	1600016N20RIK	1110034B05RIK	1600029D21RIK	1110037F02RIK	1700020C11RIK	1300001I01RIK
1110038F14RIK	1700007K13RIK	1110034G24RIK	1700001L05RIK	1300010F03RIK	1700040I03RIK	1520401A03RIK
1110057K04RIK	1700009J07RIK	1110059E24RIK	1700012B15RIK	1600002H07RIK	1700061G19RIK	1600012P17RIK
1110057P08RIK	1700009P17RIK	1110067D22RIK	1700030K09RIK	1600021P15RIK	1810020D17RIK	1600014K23RIK
1300003B13RIK	1700010L13RIK	1190002A17RIK	1700031F05RIK	1700014D04RIK	2010015L04RIK	1700019D03RIK
1300014I06RIK	1700012B07RIK	1190002N15RIK	1700039E15RIK	1700016M24RIK	2300002M23RIK	1700019G17RIK
1600015I10RIK	1700019B03RIK	1190003J15RIK	1700054N08RIK	1700020O03RIK	2310015D24RIK	1700019N19RIK
1700001C19RIK	1700023I07RIK	1200011I18RIK	1700091H14RIK	1700025G04RIK	2310038E17RIK	1700021K19RIK
1700001F09RIK	1700024G13RIK	1500009C09RIK	1700106N22RIK	1700026D08RIK	2310046K01RIK	1700028N14RIK
1700006A11RIK	1700025F22RIK	1600027N09RIK	1810026J23RIK	1700034H15RIK	2510003E04RIK	1700029H14RIK
1700006E09RIK	1700029G01RIK	1700007I08RIK	1810074P20RIK	1700034J05RIK	2610002I17RIK	1700034F02RIK
1700008I05RIK	1700040F17RIK	1700010H22RIK	2010001E11RIK	1700052N19RIK	2610008E11RIK	1700038P13RIK
1700010B08RIK	1700048O20RIK	1700011H14RIK	2010003O02RIK	1700111E14RIK	2700023E23RIK	1700047I17RIK
1700010D01RIK	1700066B19RIK	1700012A16RIK	2010204K13RIK	1700128E19RIK	2700078E11RIK	1700049G17RIK
1700011A15RIK	1700067K01RIK	1700016H13RIK	2200002K05RIK	1700128F08RIK	2700081O15RIK	1700081L11RIK
1700011M02RIK	1700069B07RIK	1700022I11RIK	2210010C04RIK	1810048J11RIK	2810021B07RIK	1810008A18RIK
1700012P22RIK	1700071K01RIK	1700029P11RIK	2210016F16RIK	2010001M09RIK	2810026P18RIK	1810012P15RIK
1700013N18RIK	1700084C01RIK	1700037H04RIK	2310004N24RIK	2010007H06RIK	2810047C21RIK	1810013D10RIK
1700020L24RIK	1700109H08RIK	1700061I17RIK	2310007B03RIK	2010107G23RIK	3110002H16RIK	1810041L15RIK
1700023E05RIK	1700110I01RIK	1700113I22RIK	2310014L17RIK	2010317E24RIK	3110056O03RIK	1810063B07RIK
1700029F09RIK	1810022C23RIK	1810019J16RIK	2310028H24RIK	2210023G05RIK	3632413A11RIK	2010109I03RIK
1700029F12RIK	1810030O07RIK	1810024B03RIK	2310042D19RIK	2310022A10RIK	4632434I11RIK	2010111I01RIK
1700029I01RIK	1810033B17RIK	1810030N24RIK	2310067B10RIK	2310035C23RIK	4732444A12RIK	2210009G21RIK
1700029I15RIK	2010300C02RIK	1810032O08RIK	2400001E08RIK	2310039D24RIK	4831426I19RIK	2210012G02RIK
1700034O15RIK	2210018M11RIK	1810037I17RIK	2410089E03RIK	2310047M10RIK	4832428D23RIK	2310001A20RIK
1700041G16RIK	2210404J11RIK	1810043G02RIK	2500003M10RIK	2410003K15RIK	4921515J06RIK	2310005G13RIK
1700047G07RIK	2210411K11RIK	1810046J19RIK	2610019F03RIK	2410042D21RIK	4930427A07RIK	2310008H09RIK
1700055D18RIK	2300003K06RIK	1810058I24RIK	2610034M16RIK	2410127L17RIK	4930452B06RIK	2310014H01RIK
1700093J21RIK	2300005B03RIK	2010002M12RIK	2610042L04RIK	2700078K21RIK	4930463O16RIK	2310022B05RIK
1700101G07RIK	2310001H12RIK	2210016L21RIK	2610044O15RIK	2700089E24RIK	4930510E17RIK	2310037I24RIK
1700123O20RIK	2310011J03RIK	2210020M01RIK	2700086A05RIK	2810459M11RIK	4930524L23RIK	2310044G17RIK
1700125H20RIK	2310033P09RIK	2310003C23RIK	2810006K23RIK	3110018I06RIK	4930555K19RIK	2310046O06RIK
1810010K12RIK	2310047B19RIK	2310007L24RIK	2810025M15RIK	3230401D17RIK	4930578G10RIK	2410002I01RIK
1810031K17RIK	2310061C15RIK	2310008H04RIK	2810032G03RIK	4631416L12RIK	4930599N23RIK	2410131K14RIK
2010002N04RIK	2310079N02RIK	2310016C08RIK	2810407C02RIK	4632433K11RIK	4931431C16RIK	2510009E07RIK
2010003K11RIK	2410091C18RIK	2310021H06RIK	2810408A11RIK	4833420G17RIK	4932411N23RIK	2510049J12RIK
2010110P09RIK	2510012J08RIK	2310042E22RIK	2810432L12RIK	4930444A02RIK	4932422M17RIK	2610027L16RIK
2010321M09RIK	2510039O18RIK	2310045N01RIK	2810453I06RIK	4930469G21RIK	4932438A13RIK	2610029G23RIK
2200002D01RIK	2610034B18RIK	2310046A06RIK	3000002C10RIK	4930485B16RIK	4932442E05RIK	2610030H06RIK
2210010C17RIK	2610036D13RIK	2310057M21RIK	3110047P20RIK	4930539E08RIK	4933403O08RIK	2610101N10RIK
2210017I01RIK	2610301G19RIK	2410004B18RIK	3110057O12RIK	4930544G11RIK	4933433P14RIK	2610109H07RIK
2210021J22RIK	2700007P21RIK	2410016O06RIK	4833413D08RIK	4930568D16RIK	4933439F18RIK	2610507B11RIK
2210404O07RIK	2810046L04RIK	2410022L05RIK	4921517D21RIK	4930579G24RIK	5031439G07RIK	2700050L05RIK
2210406O10RIK	2810055G20RIK	2410137M14RIK	4921536K21RIK	4930594M22RIK	5730455P16RIK	2810021J22RIK
2210415F13RIK	2900011O08RIK	2610018G03RIK	4921539E11RIK	4930597O21RIK	5730508B09RIK	2810030E01RIK
2310002L13RIK	3010026O09RIK	2610021K21RIK	4922501C03RIK	4931406B18RIK	5730596B20RIK	2810474O19RIK
2310003F16RIK	3110001I22RIK	2610024G14RIK	4922505G16RIK	4931406C07RIK	6130401L20RIK	2900026A02RIK
2310016E02RIK	3110062M04RIK	2610028A01RIK	4930415F15RIK	4932411E22RIK	6430598A04RIK	3110007F17RIK
2310016G11RIK	3200002M19RIK	2700046A07RIK	4930422G04RIK	4932438H23RIK	8430426H19RIK	3110039M20RIK
2310021P13RIK	4631405J19RIK	2810002N01RIK	4930431F12RIK	4933409K07RIK	9030224M15RIK	3110043O21RIK
2310036O22RIK	4833422F24RIK	2810408M09RIK	4930432E11RIK	4933421E11RIK	9130017N09RIK	3830431G21RIK
2310044H10RIK	4921513D11RIK	2810422J05RIK	4930451C15RIK	4933427D06RIK	9130019O22RIK	4432412L15RIK
2310061I04RIK	4930426D05RIK	2900062L11RIK	4930451G09RIK	5430416O09RIK	9230109A22RIK	4632411B12RIK
2310061J03RIK	4930432K09RIK	2900092C05RIK	4930505A04RIK	5430427O19RIK	9630033F20RIK	4632428N05RIK
2400003C14RIK	4930435E12RIK	3110009E18RIK	4930513N10RIK	5730407I07RIK	9930014A18RIK	4732418C07RIK
2510006D16RIK	4930435H24RIK	3110040N11RIK	4930522N08RIK	6030422M02RIK	9930023K05RIK	4732456N10RIK
2610002D18RIK	4930447A16RIK	3110049J23RIK	4930523C07RIK	6030446N20RIK	A030009H04RIK	4921513D23RIK
2610002M06RIK	4930458L03RIK	3830417A13RIK	4930547C10RIK	6430526N21RIK	A130023I24RIK	4921517D22RIK
2610015P09RIK	4930474N05RIK	4833439L19RIK	4930548G14RIK	6430553K19RIK	ABCB9	4921517L17RIK
2610028H24RIK	4930503B20RIK	4833442J19RIK	4930555G01RIK	6430571L13RIK	ACD	4921522P10RIK
2610110G12RIK	4930503L19RIK	4921523A10RIK	4930555I21RIK	6430704M03RIK	ADRBK1	4921528I07RIK
2700062C07RIK	4930511M11RIK	4921524J17RIK	4931414P19RIK	7420416P09RIK	AIPL1	4922501L14RIK
2700097O09RIK	4930512B01RIK	4921528O07RIK	4931415C17RIK	8030463A06RIK	AK3L2-PS	4930402E16RIK
2810007J24RIK	4930534B04RIK	4921530L21RIK	4932412H11RIK	8430419L09RIK	ANK	4930402H24RIK
2810008M24RIK	4930538K18RIK	4930402F06RIK	4932425I24RIK	9130017K11RIK	ANKAR	4930407I10RIK
2810021G02RIK	4930546C10RIK	4930404H21RIK	4932430I15RIK	9330101J02RIK	ANKDD1B	4930438A08RIK
2810408P10RIK	4930562C15RIK	4930415L06RIK	4933408B17RIK	9930012K11RIK	ANKLE2	4930441O14RIK
2900055J20RIK	4930572J05RIK	4930417G10RIK	4933427I04RIK	9930013L23RIK	ANKS6	4930444P10RIK
2900092E17RIK	4930579J09RIK	4930417M19RIK	4933430H15RIK	9930032O22RIK	ANLN	4930467E23RIK
3110001D03RIK	4930588K23RIK	4930429B21RIK	4933439C10RIK	9930104L06RIK	ANO10	4930486G11RIK
3110021A11RIK	4930588N13RIK	4930473A06RIK	5330437I02RIK	A130010J15RIK	APLP2	4930519G04RIK
3110035E14RIK	4930590J08RIK	4930529F22RIK	5430405G05RIK	A130042E20RIK	APOL10A	4930526A20RIK
3110048L19RIK	4931408C20RIK	4930533K18RIK	5430413K10RIK	A130066N16RIK	APOL10B	4930529M08RIK
3632451O06RIK	4931409K22RIK	4930544M13RIK	5730419I09RIK	ABCC2	APOL10C	4930579C12RIK
3830406C13RIK	4931417G12RIK	4930550C14RIK	6330545A04RIK	ABCC8	APOL8	4931406P16RIK
4430402I18RIK	4931429I11RIK	4930564D02RIK	6430548M08RIK	ABHD4	APOL9A	4932415M13RIK
4632404H12RIK	4932435O22RIK	4930579G22RIK	6430550D23RIK	ACPT	APOL9B	4932418E24RIK
4833424O15RIK	4933402P03RIK	4931403M11RIK	6530411M01RIK	ACSBG2	ARFIP1	4932441B19RIK
4921528I01RIK	4933403F05RIK	4931429L15RIK	7120451J01RIK	ACSL1	ARHGAP17	4933407H18RIK
4930408O21RIK	4933403G14RIK	4931429P17RIK	8030423F21RIK	ACTR1A	ARRB2	4933413G19RIK
4930412O13RIK	4933407C03RIK	4931440F15RIK	8030462N17RIK	ADCY8	AS3MT	4933413J09RIK
4930417O22RIK	4933407E24RIK	4932429P05RIK	8430406I07RIK	ADCY9	ASAH1	4933426M11RIK
4930443G12RIK	4933407P14RIK	4932441K18RIK	9030409G11RIK	ADD1	ASAH2	4933440M02RIK
4930449A18RIK	4933409G03RIK	4933402E13RIK	9030625A04RIK	ADH7	ASNS	5430407P10RIK
4930455F23RIK	4933422H20RIK	4933402J07RIK	9130404D08RIK	ADIPOR2	ATAD3A	5430411K18RIK
4930488N24RIK	4933425L06RIK	4933406M09RIK	9130409I23RIK	AGBL2	ATF1	5730590G19RIK
4930506M07RIK	4933432B09RIK	4933411K20RIK	9230110K08RIK	AHCY	ATOX1	6030405A18RIK
4930518F22RIK	4933434E20RIK	4933411O13RIK	9330129D05RIK	AHCYL2	ATP10B	6030458C11RIK
4930520O04RIK	5430425J12RIK	4933424B01RIK	9330171B17RIK	AK129341	ATP11A	6330403L08RIK
4930524E20RIK	5430435G22RIK	4933427G23RIK	9430015G10RIK	AK157302	ATP1A2	6330416G13RIK
4930525F21RIK	5430437P03RIK	4933433C11RIK	9430038I01RIK	AKT2	ATP6V1G1	6330439K17RIK
4930526D03RIK	5730410E15RIK	4933436I01RIK	9430076C15RIK	AKT3	AXL	6330503K22RIK
4930528F23RIK	5730559C18RIK	5031414D18RIK	9830107B12RIK	AKTIP	BMP1	6330512M04RIK
4930544O15RIK	5830411N06RIK	5430402E10RIK	9930038B18RIK	APAF1	BRPF1	6720456H20RIK
4930562F07RIK	5930422O12RIK	5730409E04RIK	A230006K03RIK	ARAP3	CABC1	7420426K07RIK
4931423N10RIK	6030429G01RIK	5730455O13RIK	A230051G13RIK	ARCN1	CAD	8430410K20RIK
4931428F04RIK	6030445D17RIK	5730528L13RIK	A230052G05RIK	ARSA	CADM1	9030425E11RIK
4931431F19RIK	6330406I15RIK	5730577I03RIK	A230083G16RIK	ARSB	CADM2	9030617O03RIK
4932414J04RIK	6330408A02RIK	5830454E08RIK	A330008L17RIK	ATP1A3	CCDC104	9130008F23RIK
4933402D24RIK	6430531B16RIK	5930434B04RIK	A330021E22RIK	B3GNT7	CCDC99	9430020K01RIK
4933402N03RIK	6430573F11RIK	6230427J02RIK	A3GALT2	B430306N03R	CCR4	9530053A07RIK
4933414I15RIK	6530402F18RIK	6330444E15RIK	A430078G23RIK	B4GALNT2	CCR9	9530057J20RIK
4933415A04RIK	6530418L21RIK	6330527O06RIK	A430090L17RIK	B4GALT1	CCT3	9530077C05RIK
4933427D14RIK	6720489N17RIK	6530401D17RIK	A430105I19RIK	BAZ2A	CDCA7	9630014M24RIK
4933427E11RIK	8430429K09RIK	6530409C15RIK	A430107O13RIK	BAZ2B	CDCP1	9630028B13RIK
4933427G17RIK	9030025P20RIK	8030411F24RIK	A530013C23RIK	BBS1	CDH23	9830001H06RIK
4933430I17RIK	9130221D24RIK	8030474K03RIK	A530016L24RIK	BFSP1	CDKAL1	9930022D16RIK
5430419D17RIK	9230104L09RIK	9030624J02RIK	A530088E08RIK	BIVM	CENPB	9930111J21RIK
5730403B10RIK	9230113P08RIK	9230020A06RIK	A530088H08RIK	BMP15	CENPF	ABCB8
5730403M16RIK	9330175E14RIK	9530008L14RIK	A630007B06RIK	BRD4	CENPJ	ABCC5
5730446D14RIK	9330182L06RIK	9530068E07RIK	A630033H20RIK	BRD8	CENPL	ABCC6
5730469M10RIK	9430031J16RIK	9830147E19RIK	A730008H23RIK	BRDT	CLK3	ACPP
5730494N06RIK	9530080O11RIK	AARSD1	A730011L01RIK	BRE	CLK4	ACTN4
5830415F09RIK	9930021D14RIK	AASS	A730017C20RIK	BRIP1	CLN5	AIFM2
5830477G23RIK	A230050P20RIK	AATK	A730036I17RIK	CARNS1	COBLL1	AK1
5930412G12RIK	A2BP1	AB041803	A730037C10RIK	CASP2	COL14A1	ANGPTL7
6330409D20RIK	A330049M08RIK	AB041806	A730049H05RIK	CASP4	CPM	ANK2
6430503K07RIK	A430110N23RIK	ABCA1	A830007P12RIK	CATSPERG1	CRK	ANK3
6720456B07RIK	A530054K11RIK	ABCA13	A830010M20RIK	CATSPERG2	CRLF3	AP3S2
8430408G22RIK	A630081J09RIK	ABCA15	A830018L16RIK	CCNG1	CRNKL1	AP4E1
9030418K01RIK	A930001N09RIK	ABCA3	A830080D01RIK	CCT4	CRYZ	ARHGEF9
9030619P08RIK	A930016O22RIK	ABCA4	A830093I24RIK	CDNF	CSF2RA	ARRDC4
9130011J15RIK	A930024E05RIK	ABCB11	A930002I21RIK	CHST4	CSRP2BP	ATE1
9230105E10RIK	AA386476	ABCB1A	A930011G23RIK	CHST5	DDX20	ATF2
9230112E08RIK	ABCC10	ABCB1B	A930038C07RIK	CHST7	DHH	ATHL1
9330158H04RIK	ABCC3	ABCB4	AA408296	CLK1	DOK1	ATP6V1B2
9430021M05RIK	ACP5	ABCB7	AA986860	COL10A1	DPF1	ATP8B1
9430070O13RIK	ACTR2	ABHD11	AAAS	COL11A1	DYRK3	ATP8B2
9630013D21RIK	ACTR3	ABHD6	ACTN1	COL11A2	E2F1	ATP8B3
A130022J15RIK	ACTR8	ABI1	ADRA1B	CSDA	ENPP4	BAT3
A130050O07RIK	ADA	ABI2	ADRA2A	CSDC2	EPC2	BHLHA15
A230046K03RIK	ADRA1D	ABI3	ADRA2B	CSE1L	EPHA1	BIRC6
A230051N06RIK	ADSL	ABI3BP	ADRB3	CSF3	EPHA3	BMF
A430033K04RIK	AES	ABL1	ADRBK2	CSF3R	EPHA4	CACNA2D3
A430060F13RIK	AF251705	ACE2	ADSS	CUBN	EPHA5	CARM1
A430084P05RIK	AFAP1	ACER1	AEBP2	CYC1	EPHB1	CASKIN2
A430089I19RIK	AGBL5	ACER2	AIFM3	CYFIP2	ERCC3	CBX6
A430093F15RIK	AGFG1	ACER3	AIG1	CYLD	ESAM	CBX6-NPTXR
A430110L20RIK	AGFG2	ACSF3	ANAPC10	CYP2C29	ESRRA	CCBE1
A4GALT	AGXT	ACSL4	ANAPC11	CYP2C38	EVPL	CDKN2AIPNL
A4GNT	AGXT2L2	ACSS1	ANGEL1	CYP2C39	FAM43B	CELF1
A530006G24RIK	AHR	ACTA1	ANGPT4	CYP46A1	FAM46A	CELSR1
A530023O14RIK	AHRR	ACTA2	AP1S3	CYP4A14	FAM50A	CELSR2
A530053G22RIK	AHSA2	ACTBL2	AP3D1	DCLK3	FAM53A	CELSR3
A530099J19RIK	AI118078	ACTG-PS1	AP3M1	DENND1A	FAM5B	CGN
A630001G21RIK	AI182371	ACTG1	AP3M2	DENND2C	FAM65A	CHD3
A630033E08RIK	AI314180	ACTG2	AQR	DENND4A	FBN1	CHD5
A630091E08RIK	AI317395	ACTR1B	ARSK	DIO3	FBXL12	CHD6
A730018C14RIK	AI427809	ACTR5	ASPG	DISC1	FBXL14	COBL
A730045E13RIK	AI452195	ACVR1	ATP7A	DISP2	FBXL16	COG3
A930003A15RIK	AI464131	ACVR1B	ATP7B	DKK2	FBXL17	COG4
A930004D18RIK	AI467606	ACVR1C	ATP8A1	DLX1	FBXO8	COG5
A930039A15RIK	AI480653	ACYP2	ATP8B4	DPF2	FBXO9	COPA
AA388235	AI481877	ADAL	BIRC2	EGLN1	FBXW13	CPLX1
AA415398	AI504432	ADAM10	BLCAP	EIF4E3	FRMD5	CPLX2
AA792892	AI507597	ADAM11	BLM	EIF4EBP1	FRMD6	CPLX4
AA881470	AI606181	ADK	BLMH	ENTPD3	MLLT3	CRY2
AA960436	AI747448	ADM2	BLOC1S3	EPHA6	GKAP1	CRYBG3
AADAT	AI747699	ADNP	BOLA2	EPHA7	GM3080	CSF1R
ABHD5	AI836003	ADORA1	BRCA2	EPN1	GM3376	CSF2RB
ABPE	AI848100	ADORA2B	BRCC3	EXT1	GM3527	CSF2RB2
ABPZ	AI894139	ADRA1A	CABLES2	EXTL1	GM3701	DCBLD2
ABR	AICDA	AGBL3	CACNA1A	F11R	GM3706	DCC
ABT1	AIM1L	AGBL4	CACNA1B	FAM20A	GM3750	DCLK2
ACAA1B	AIM2	AIRE	CAMK1	FAM20B	GM3763	DCP1A
ACAD10	AIMP2	AIRN	CAMK1D	FAM20C	GM3912	DIXDC1
ACAD11	ALDH3A2	AK2	CAMK1G	FAM26D	GM4064	DLAT
ACHE	ALDH5A1	AK5	CAMK2A	FAM65C	GM4082	DOCK9
ACN9	ALDH8A1	AKIRIN2	CAMK2B	FBXL19	GM4202	EIF3D
ACOT3	ALDH9A1	AKNA	CAMK2D	FBXL2	GM4237	EMP1
ACOX3	ALDOA	AKR1A4	CAMK2G	FBXL3	GM4734	ENO2
ACRV1	ALDOART1	AKR1B8	CAMSAP1L1	FBXW10	GM4754	ENOX2
ACSBG1	ALDOART2	AKR1C14	CASP12	FGF12	GM4798	ENPEP
ACSL6	ALDOB	AKR1C18	CASP14	FHOD1	GM4884	ENPP1
ACTN2	ALLC	AKT1	CBR4	FHOD3	GM5196	ENPP3
ADAM19	ALOX12B	ALX1	CD151	FLAD1	GM5465	EPC1
ADAM1B	ANAPC4	ALX3	CD209E	FLCN	GM5472	EPHA8
ADAM2	ANAPC5	AMD-PS3	CD22	FLII	GM5615	ERC2
ADAM5	ANGPT1	AMD-PS4	CD244	FOSB	GM5648	ESRRB
ADAM7	ANGPTL4	AMD-PS6	CDC20	FOXB1	GM5778	EXD2
ADAM8	ANO1	AMD-PS7	CDH26	FOXO1	GM5792	EXOG
ADAM9	AP2A1	AMD1	CENPM	FOXO3	GM5893	EYA3
ADAMTS15	APOBEC1	AMD2	CENPO	FRMD4A	GM5898	EZH1
ADAMTS16	APOBEC2	AMFR	CNDP1	FRMD4B	GM5939	FAM48A
ADAMTS17	APOL7C	AMICA1	CNDP2	FRS3	GM597	FAM49B
ADAMTS18	AQP11	AMIGO1	CNGA3	FRY	GM6375	FAM73B
ADAMTS19	ARHGAP25	AMIGO3	CNGB3	FRYL	GM6543	FBF1
ADAMTSL3	ARRDC1	AMT	CNIH2	FSD1	GM6737	FBXL20
ADAR	ARRDC2	AMTN	CNIH4	FSD2	GM6829	FBXO44
ADARB1	ART5	AMY2A1	CNKSR1	FSHB	GM6901	FBXO45
ADARB2	ARTN	AMY2A2	CNN1	GEM	GM6917	FBXO46
ADAT3	ARVCF	AMY2A3	CNN2	GEMIN4	GM7059	FBXO7
ADCK1	ASAP2	AMY2A4	COL4A2	GEN1	GM7102	FCGR1
ADCK2	ASAP3	AMY2B	COL4A3	GFAP	GM7114	FGF1
ADCY1	ASB1	ANGPTL6	COL4A4	GFRA1	GM7204	FITM2
ADCYAP1	ASB14	ANKLE1	COL5A2	GGA2	GM7308	FKRP
ADCYAP1R1	ASCL1	ANKMY1	COL6A2	GJA5	GM7341	FLT4
ADIPOR1	ATF3	ANKMY2	COL6A3	GLB1L	GM7469	FRMD3
ADRA2C	ATF5	ANKRD29	COPB2	GM3106	GM7493	FRS2
AEN	ATF6	ANKRD32	COPZ2	GM3139	GM7505	FSCN1
AGMAT	ATF6B	ANKRD33B	CORIN	GM3147	GM766	FSD1L
AGO2	ATF7	ANKRD35	CPLX3	GM3176	GM7721	FZD1
AGPHD1	ATF7IP	ANKRD40	CRIPT	GM3183	GM7743	FZD4
AGRN	ATG10	ANKRD43	CRYAA	GM3200	GM7852	GAB1
AGT	ATP10D	ANKRD46	CRYM	GM3203	GM8010	GARNL3
AGTR1B	ATP13A2	ANKRD53	CSNK1A1	GM3222	GM8396	GCK
AHCYL1	ATP9A	ANKRD54	CSNK1D	GM3272	GM8399	GCNT3
AHDC1	ATP9B	ANKRD57	CSNK1E	GM3534	GM8543	GDAP1
AHI1	ATRX	ANKRD6	CSNK1G3	GM3671	GM8590	GIGYF1
AIP	ATXN1	ANKS1	CSNK2A1	GM3687	GM8892	GIGYF2
AK7	B4GALT2	ANKS1B	CSTA	GM3695	GM9529	GJD4
AKAP10	BARX1	AP1G2	CTF1	GM3809	GM9755	GJE1
ALAS2	BASP1	APOA5	CYR61	GM3839	GPATCH4	GLYCTK
ALDH16A1	BAT2L	APOB48R	CYTSB	GM3892	GSS	GM2A
ALDOC	BAT2L2	APON	D10BWG1379E	GM3893	GTF3C5	GM3076
ALG14	BCAR1	ARHGAP10	D10WSU102E	GM4024	HABP4	GM3089
ALG2	BCAR3	ARHGAP11A	D15ERTD621E	GM4070	HACE1	GM3113
AMPD2	BCAS1	ARHGAP12	D15WSU169E	GM4116	HERC4	GM318
ANGEL2	BCAS3	ARHGAP15	D16H22S680E	GM4217	HERC5	GM3259
ANGPTL2	BHLHA9	ASNSD1	D17WSU92E	GM4223	HSD3B7	GM3302
ANXA3	BHMT	ASPSCR1	D2HGDH	GM4327	HYAL2	GM3608
ANXA7	BHMT-PS1	ASRGL1	D2WSU81E	GM4335	IBTK	GM3624
AOAH	BHMT2	ASS1	D3BWG0562E	GM4459	ICAM1	GM3643
AP2A2	BICC1	ASTN1	D4ERTD22E	GM4510	IGF2BP3	GM3888
AP2B1	BICD1	ATAD5	D6WSU163E	GM4575	IGF2R	GM4479
AP2M1	BICD2	ATG16L1	D8ERTD738E	GM4609	ILDR1	GM4500
AP3B1	BID	ATG16L2	DAAM1	GM4654	ILDR2	GM4521
APEX2	BIN3	ATG2A	DAAM2	GM4672	ITFG1	GM4631
AR	CAB39	ATG2B	DAO	GM4691	ITGA11	GM4696
ARF5	CABIN1	ATG3	DAPK1	GM4769	KHNYN	GM4697
ARL6IP1	CABLES1	ATG4A	DCDC5	GM4847	KIDINS220	GM4724
ARL8A	CABYR	ATG4B	DCHS1	GM4861	KIF18B	GM4776
ARL8B	CACNA2D1	ATG7	DCK	GM4870	KIF1B	GM4811
ARSG	CAMTA1	ATG9A	DCLK1	GM4929	KIF20A	GM4876
ART1	CAPN10	ATL1	DCLRE1B	GM4956	KIF20B	GM4948
ART4	CAPN9	ATP11B	DLC1	GM4976	KLHL21	GM4972
ATIC	CBLN1	ATP11C	ELF3	GM5043	KLHL26	GM4980
ATP1B1	CBLN2	ATP12A	ELF4	GM5084	KLHL29	GM5081
ATP1B2	CBLN3	ATP1A4	ELF5	GM5109	LMF2	GM5167
ATP1B4	CBLN4	ATP6V1G3	ELFN1	GM5117	LMO7	GM5336
ATP2A1	CBX2	ATP6V1H	ELFN2	GM5138	LMOD1	GM5373
ATP2B4	CBX3	B4GALT4	ELL	GM5422	LMTK2	GM5423
ATP2C2	CBX7	B4GALT5	ELL2	GM5454	LMTK3	GM5431
ATP5S	CCAR1	B4GALT6	ELMO1	GM5469	LMX1A	GM5444
ATP6AP1	CCDC108	B630019A10R	ELMO2	GM5507	LRRC7	GM5478
ATP6V0A1	CCDC110	B630019K06R	EMP2	GM5531	LRRFIP1	GM5562
ATP6V0A4	CCDC114	B9D2	EPHA2	GM5550	LRSAM1	GM5591
ATP6V1A	CCDC115	BAALC	EPRS	GM5593	LSG1	GM5600
ATP6V1C1	CCDC116	BBS7	ESYT2	GM5597	LYG2	GM5607
ATP6V1F	CCDC117	BCL7B	F13A1	GM5626	MAGIX	GM5708
ATP6V1G2	CCDC120	BCL7C	F2RL2	GM5652	MAP4K3	GM5780
ATXN10	CCIN	BCL9	F5	GM5732	MAPK7	GM5789
ATXN1L	CCL1	BCMO1	FA2H	GM5787	MARCKS	GM5820
ATXN2	CCL11	BHLHE22	FAAH	GM5806	MBD1	GM5831
ATXN3	CCL12	BMI1	FAM105A	GM5815	MBNL3	GM5858
ATXN7	CCL6	BRD9	FAM107A	GM5840	MBOAT2	GM5864
ATXN7L1	CCL8	BRI3	FAM171A1	GM5841	METRNL	GM5920
ATXN7L2	CCL9	BRI3BP	FAM171B	GM5863	MMEL1	GM5945
ATXN7L3	CCM2	BRMS1L	FARSA	GM5871	MMGT1	GM5951
AXIN2	CCNA1	BRSK1	FAT2	GM5896	MSTO1	GM609
AY702103	CCNB3	BRSK2	FAT3	GM5909	MSX3	GM6120
AY761184	CCNO	BRWD1	FAT4	GM606	MTAP1S	GM6158
AZGP1	CCNYL1	BSG	FBLN5	GM6091	MTAP9	GM6162
B020004C17RIK	CCR3	BSN	FBN2	GM6153	MTCH1	GM6205
B020004J07R	CCR5	BST1	FGF10	GM6254	MURC	GM6206
B020018G12R	CCR7	BTBD3	FGF11	GM6263	MUSK	GM6367
B130024G19R	CD160	BTBD9	FGF13	GM6283	NAPB	GM6562
B230118H07R	CD163L1	CALR4	FGF14	GM6305	NAPG	GM6579
B230208H17R	CD19	CALU	FKBP10	GM6457	NARF	GM6604
B230219D22R	CD209B	CAMKK2	FLOT1	GM6493	NARS	GM6710
B230307C23R	CD3G	CARS	FLRT2	GM6498	NARS2	GM672
B230315N10R	CD4	CASC3	FOXI2	GM6506	NCAM2	GM6766
B230317F23R	CD40	CASC4	FOXJ3	GM6528	NDUFS2	GM6818
B230340J04R	CD44	CASC5	FOXK1	GM6531	NLK	GM6833
B3GALT1	CD6	CASR	FRRS1	GM6560	NOL11	GM6847
B3GALT2	CD68	CASS4	FSHR	GM6636	NOMO1	GM6853
B3GALT5	CD69	CBFB	GAS2	GM6641	NQO1	GM6866
B3GALT6	CD8A	CCDC106	GATA1	GM6685	NUDT9	GM6910
B3GALTL	CDC25B	CCDC61	GCC1	GM6705	NUF2	GM6999
B3GNT1	CDCP2	CCDC62	GCC2	GM6742	PALLD	GM7085
B3GNT2	CDH1	CCDC63	GDAP1L1	GM6758	PARG	GM7148
B3GNT3	CDH12	CCDC64	GK5	GM6772	PARP10	GM7239
B3GNT8	CDH13	CCKAR	GM3005	GM6793	PARP9	GM7281
B3GNT9	CDH22	CCNG2	GM3012	GM694	PAX6	GM7423
B3GNTL1	CDKL3	CCNJ	GM3015	GM6944	PAX7	GM7452
B4GALNT3	CDKN1A	CCRN4L	GM3020	GM6946	PAXIP1	GM7526
BAT4	CDKN1B	CDCA7L	GM3029	GM6992	PDGFRL	GM7757
BBOX1	CDKN2D	CDCA8	GM3047	GM711	PDHA1	GM7827
BCCIP	CES7	CDH19	GM3050	GM7129	PDZD11	GM7879
BDH2	CES8	CDH2	GM3072	GM7183	PDZD2	GM7919
BDNF	CHAT	CDK8	GM3095	GM7208	PFKP	GM8000
BEAN	CKM	CDK9	GM3099	GM7210	PHYH	GM8086
BEAN1	CKMT1	CDKL2	GM3115	GM7278	PLD6	GM8261
BECN1	CLM3	CDS2	GM3127	GM7286	PPIL4	GM8282
BEND3	CLMN	CDX4	GM3138	GM7293	PPIP5K1	GM8291
BGLAP	CLPP	CEACAM16	GM3141	GM7390	PRC1	GM8494
BGLAP-RS1	CLPTM1	CEACAM18	GM3149	GM7498	PRKG1	GM8616
BGLAP2	CLPX	CEACAM19	GM3159	GM7507	PRPF39	GM8659
BGN	CLSPN	CEACAM2	GM3173	GM7543	PRR5	GM8719
BIRC3	CLSTN1	CEBPZ	GM3182	GM7545	PRRG2	GM8743
BLK	CLSTN2	CECR2	GM3187	GM7551	PRRG3	GM8750
BLOC1S2	CLSTN3	CECR5	GM3216	GM757	PRRT1	GM8752
BMP7	CLVS1	CELF2	GM3239	GM7582	PRSS29	GM8783
BMP8B	CMA2	CELF4	GM3264	GM7592	PRX	GM884
BMPR1A	CMKLR1	CELF6	GM3269	GM7609	PUS3	GM9001
BMPR1B	CML1	CENPC1	GM3298	GM7611	RAB5A	GM9057
BRD1	CML2	CENPE	GM3317	GM7622	RD3	GM9088
BRMS1	CML5	CFD	GM3338	GM7712	RTF1	GM9165
BRWD3	CMTM1	CHTF18	GM3344	GM7756	RTKN	GM9531
BTK	CNGA4	CKAP5	GM3366	GM7784	RTN1	GM9613
BTLA	CNKSR2	CKS1B	GM3408	GM7789	RUFY1	GM973
BTN1A1	CNNM4	CLCN1	GM3424	GM7792	RUFY2	GM9769
BTN2A2	COG1	CLCN2	GM3453	GM7809	SCRN3	GM98
BTN3A3	COG8	CLCN3	GM3460	GM7819	SDC1	GM9845
BUTR1	COL15A1	CLCN4-2	GM3476	GM7829	SEC22C	GM9949
BY080835	COL17A1	CLCN5	GM3483	GM7993	SEC24A	GNAI2
BYSL	COL18A1	CLCN6	GM3485	GM8055	SEC31A	GNAI3
BZRAP1	COL4A6	CLCNKA	GM3488	GM8100	SEC31B	GNG7
C030006K11R	COPS3	CLDN1	GM3494	GM8174	SEC61A1	GOLGA4
C030016D13R	COPS4	CLEC18A	GM3518	GM8280	SEMA3F	GREM2
C030019I05R	COPS7A	CLEC2D	GM3526	GM829	SEMA4A	GRIK4
C030039L03R	CREB3	CLEC2E	GM3542	GM8318	SEMA4C	GRIK5
C030046E11R	CREB3L1	CLEC2H	GM3555	GM8349	SEMA4D	GRIN1
C030046I01R	CREB3L2	CLEC2I	GM3578	GM8416	SEMA4F	GSTM1
C130021I20R	CREB3L3	COMMD7	GM3591	GM8513	SETD3	GSTZ1
C130022K22R	CREB5	COMP	GM3594	GM8514	SEZ6	HAPLN3
C130026I21R	CREBL2	CRKL	GM3597	GM8515	SFXN5	HAPLN4
C130026L21R	CREBRF	CRMP1	GM3599	GM8546	SGCA	HARBI1
C130039O16R	CREM	CRYAB	GM3606	GM8615	SGCB	HECW1
C130057N11R	CRISPLD1	CRYBA1	GM3607	GM8683	SLC16A7	HEYL
C130060K24R	CRISPLD2	CSDE1	GM3633	GM8825	SLC27A2	HIF1AN
C130071C03R	CSNK1G1	CSGALNACT2	GM3636	GM8899	SLC29A3	HOXA1
C130073F10R	CSPG4	CSK	GM3642	GM8902	SLC6A20A	HSPA13
C130074G19R	CSRP3	CSMD1	GM3655	GM8990	SMG5	HSPA4L
C1D	CST7	CSMD2	GM3667	GM8991	SMN1	HVCN1
C1QTNF1	CSTAD	CSMD3	GM3675	GM8995	SMOK3A	HYAL1
C1QTNF7	CTNNA1	CST13	GM3685	GM9034	SMOK3B	IARS
C1QTNF9	CTNNAL1	CTSR	GM3696	GM9061	SMOK3C	ICA1L
C230012O17R	CTNND2	CYCS	GM3703	GM9081	SMPD3	ISPD
C230062I16R	CTNS	CYFIP1	GM3715	GM9091	SOAT1	ITCH
C230081A13R	CTTN	CYP27A1	GM3727	GM9115	SPCS2	ITGA10
C2CD2	CTTNBP2	CYP27B1	GM3739	GM9127	SPR	KHSRP
C2CD2L	CTTNBP2NL	CYP2B10	GM3752	GM9209	SPRN	KIF11
C2CD3	CYS1	CYP2B13	GM3760	GM9242	SPRR2A1	KIF1C
CABP1	CYSLTR1	CYP2B9	GM3852	GM9329	SPRR2A3	KIF5C
CACNA1D	CYTH3	CYP4A10	GM3956	GM9568	SSPO	LEPRE1
CACNA1E	D030056L22RIK	CYP4A31	GM3962	GM9619	STK39	LGI1
CACNA1F	D030074E01RIK	CYP4A32	GM3972	GM9646	STK4	LGI2
CACNA1I	D11BWG0517E	CYP51	GM3978	GM9653	STMN4	LLGL2
CACNA2D4	D11WSU99E	CYP7A1	GM3991	GM9723	SUGT1	MAMLD1
CACNB2	D14ABB1E	DAPK3	GM4033	GM9797	SULF1	MAP3K2
CACNB4	D14ERTD668E	DCAF13	GM4073	GM9799	SULF2	MAPKAPK3
CACNG1	D17ERTD663E	DCAKD	GM4184	GM9840	SYNC	MAPKBP1
CAMTA2	D19ERTD386E	DCLRE1C	GM4234	GM9855	SYNE1	MASP1
CANT1	D19ERTD652E	DDAH2	GM4245	GPC4	SYNE2	MBTD1
CAPG	D1ERTD622E	DDI2	GM4248	GRIN2A	SYNGR3	MECP2
CAPNS1	D230037D09RIK	DDX46	GM428	GRIN2B	SYNJ1	MED13
CAPRIN1	D330012F22RIK	DDX47	GM4425	HADH	SYNJ2	MGRN1
CAPZA1	D330045A20RIK	DDX51	GM4713	HARS2	TCF3	MLL1
CAPZA2	D3ERTD751E	DDX52	GM4723	HDGF	TECPR1	MNT
CAPZB	D430018E03RIK	DDX54	GM4759	HGS	TECPR2	MOBKL1A
CAR10	D430041D05RIK	DDX55	GM4796	HHAT	TINF2	MOBKL1B
CAR11	D630008O14RIK	DDX56	GM4879	HHIP	TIPIN	MOBKL2C
CAR12	D630023F18RIK	DDX58	GM4894	HIGD1C	TIRAP	MOBP
CAR14	D630039A03RIK	DDX6	GM4928	HS3ST4	TMEM185B	MPP5
CAR2	D630045J12RIK	DEB1	GM4992	HS6ST2	TMEM194B	MPRIP
CAR5B	D6WSU116E	DENND1B	GM5127	HSPA5	TMEM2	MPZL3
CAR8	D730040F13RIK	DENND2D	GM5166	ICAM2	TMEM20	MSH6
CARD6	D930015E06RIK	DKK1	GM5242	IGFBP7	TMEM202	MTAP1A
CASP3	D930020B18RIK	DLG2	GM5429	IGJ	TMEM30A	MYH10
CASP6	D930020E02RIK	DLG3	GM5433	IGSF11	TRIM24	NEFM
CASP9	D930048N14RIK	DLG4	GM5435	ING5	TRIM72	NEGR1
CBS	D930049A15RIK	DNAJB11	GM5447	ISCA1	TRIM75	NEURL3
CBWD1	DAGLA	DNAJB2	GM5458	ITFG2	TRNP1	NFATC1
CCBL2	DAK	DNAJC16	GM5499	IYD	TRNT1	NFATC2
CCBP2	DAND5	DNAJC2	GM5510	JAM2	TRP53INP1	NFE2L2
CCDC102A	DCDC2A	DNAJC21	GM5535	JPH2	TRP53INP2	NFIA
CCDC103	DCLRE1A	DNAJC27	GM5546	JRK	TTYH1	NFIB
CCDC65	DCST1	DNAJC3	GM5553	JUN	UCN3	NISCH
CCDC66	DDIT4	DNMT1	GM5567	KANK2	UEVLD	NKAIN4
CCDC67	DDIT4L	DNMT3A	GM5583	KIF12	ULK2	NKAP
CCDC77	DDR1	DNMT3B	GM5616	KIF13A	USP44	NKIRAS2
CCDC88B	DDR2	DOM3Z	GM5618	KIF14	USP46	NOL4L
CCDC88C	DDX10	DONSON	GM5747	KIF17	UTRN	NOSIP
CCDC92	DDX17	DPPA3	GM5795	LCP2	VPS33A	NPC1
CCDC93	DDX19B	DSCAM	GM5797	LCT	VPS4A	NPTXR
CCDC94	DDX39	DSCAML1	GM5801	LDHD	VPS4B	NR1I2
CCDC96	DDX3X	DSCR3	GM5828	LGI3	VPS53	NSD1
CCDC97	DDX3Y	DULLARD	GM5899	LIG1	WBP2NL	NTNG1
CCNH	DDX4	DUOX1	GM5922	MAFK	WBP4	ODZ3
CCNI	DDX41	DUOX2	GM6036	MAGEB16	WDFY1	ONECUT2
CCNJL	DGKA	DUOXA1	GM608	MAP2K6	WDFY3	OSTA
CCNK	DGKB	DYSF	GM6141	MAP2K7	WDR89	OTOF
CCT5	DGKD	E030002O03R	GM6190	MAP3K1	WEE2	OTOG
CCT8L1	DGKE	E030010A14R	GM6245	MBOAT7	XKR7	P2RY2
CD109	DGKQ	E130012A19R	GM6337	MBP	ZFYVE9	PAPOLB
CD200	DHCR24	E130018O15R	GM6365	METAP2		PAPOLG
CD200R1	DHCR7	E130309D14R	GM6377	MFN1		PAPPA
CD200R2	DHDDS	E130309F12R	GM6401	MFRP		PAPPA2
CD200R4	DNAJC4	E130311K13R	GM6476	MFSD10		PAQR5
CD207	DNAJC5	E230025N22R	GM6482	MGST1		PAQR8
CD209D	DNER	E2F2	GM6577	MKRN2		PARD3
CD226	DNLZ	EIF4EBP3	GM6588	MMP15		PARD3B
CD247	DNM1	EPHA10	GM6594	MOG		PARK2
CD24A	DNM1L	ERCC4	GM6637	MPPED1		PARP1
CD27	DNM3	ERCC5	GM6651	MRAP2		PARP6
CD274	DNMBP	ERCC6	GM6676	MRC2		PCNX
CD276	DOK3	ERCC6L	GM6724	MRGPRA2A		PEF1
CD28	DOK4	ETF1	GM6750	MRGPRA2B		PHF6
CD300A	DOK5	ETL4	GM6878	MSI2		PITPNM3
CD300E	DPH3	EXOC1	GM6950	MSRB3		PLAA
CD300LB	DPM2	EXOC2	GM7004	MST1		PLAGL2
CD300LD	DPP10	F13B	GM7025	MST1R		POLA2
CD300LF	DPP6	FAM26E	GM7042	MTIF3		POSTN
CD300LG	DPP8	FAM36A	GM7049	MTM1		POT1A
CD320	DTL	FAM38A	GM7125	MTMR1		POT1B
CD33	DTNA	FAM3A	GM7251	MTMR10		PPP2R1B
CD34	DTWD2	FAM40B	GM7292	MVK		PPP2R2A
CD36	DTX3L	FAM43A	GM7337	MYEOV2		PPP2R2C
CDA	DTX4	FAM54B	GM7407	MYH1		PPP2R4
CDAN1	E030002O03RIK	FAM58B	GM7446	MYH2		PPP2R5C
CDH29	E030037K03RIK	FAM59B	GM7451	MYH6		PRCP
CDH3	E130018O15RIK	FBXO11	GM7556	MYH7		PRDM11
CDK15	E130112L23RIK	FBXO16	GM7628	MYO1F		PRKCQ
CDK16	E130120F12RIK	FBXO17	GM7648	MYO3A		PRKCZ
CDK18	E130203B14RIK	FBXO18	GM7774	MYO3B		PRKD3
CDK19	E130308A19RIK	FBXO2	GM7803	MYO5A		PRKG2
CDK2	E130309D02RIK	FBXO21	GM7876	MYO5C		PSTPIP2
CDK5R1	E130309D14RIK	FBXO28	GM7929	NAP1L4		RAD50
CDK5RAP1	E130311K13RIK	FBXO3	GM7931	NDRG1		RBMS2
CDK6	E230019M04RIK	FBXO40	GM7945	NDRG4		RCBTB2
CENPN	E230025N22RIK	FBXO41	GM7951	NDST1		RDH18
CENPQ	E2F4	FBXO42	GM7954	NEK1		RDH8
CEP97	EEFSEC	FBXO43	GM7970	NEURL4		RFC1
CER1	EFCAB9	FBXW14	GM7980	NEUROD4		RFT1
CERCAM	EFHD2	FBXW21	GM8005	NEUROG3		RFTN2
CERK	EFNA5	FBXW28	GM8020	NF1		RFWD2
CES6	EIF3F	FBXW4	GM8024	NF2		RINT1
CHAMP1	EIF3J	FBXW8	GM8052	NFAM1		RNF216
CHTF8	ELMO3	FGD1	GM8068	NPY1R		RNF222
CHTOP	ELOVL5	FGD3	GM8082	NR5A1		RNF24
CHUK	ELOVL6	FGD6	GM8094	NR6A1		RPAP1
CIB2	ENO4	FGFBP3	GM8108	ORC3L		RPH3AL
CIITA	ENOPH1	FGFR1	GM8122	OTOP3		RSPRY1
CINP	ENOX1	FGFR1OP	GM8127	P2RY4		SCAPER
CLEC3B	ENPP2	FGFR2	GM8138	PABPC5		SCARA3
CLEC4A1	ENPP5	FICD	GM8159	PAPSS2		SCARF1
CLEC4A3	ENPP7	FIG4	GM8165	PARN		SCRIB
CLEC4B2	ENSMUSG00000068790	FLNA	GM8172	PAX1		SCRT1
CLEC4D	ENTPD1	FLNB	GM8177	PBX2		SCRT2
CLEC4F	ENTPD2	FLNC	GM8212	PBX3		SCUBE1
CLEC9A	EPS15L1	FOSL2	GM8220	PCDHA4		SELO
CLK2	ERBB2	FSCN3	GM8221	PCDHA5		SEPN1
CLPB	ERBB2IP	GALT	GM8229	PCDHA6		SET
CNGA1	ERCC2	GAMT	GM8232	PCDHA7		SETBP1
CNGB1	ESYT3	GAN	GM8246	PCDHA@		SETD1B
CNKSR3	EXO1	GANAB	GM8247	PCDHAC1		SETMAR
COG7	F10	GANC	GM8256	PCDHAC2		SETX
COL6A1	F630043A04RIK	GARS	GM8265	PCDHB15		SEZ6L
COLEC12	F630110N24RIK	GBP5	GM8279	PCDHB18		SFXN4
COMMD3	F7	GBP8	GM8281	PCDHB19		SHISA7
COMMD6	F730043M19RIK	GBP9	GM8283	PCDHG@		SHROOM4
COPS8	F730047E07RIK	GCDH	GM8297	PCF11		SIK1
COQ2	F830208F22RIK	GCET2	GM831	PCNXL3		SLC25A17
COQ3	FADS1	GCFC1	GM8348	PCP4L1		SLC25A44
COQ4	FADS2	GCNT4	GM8356	PDE1B		SLC39A1
CORO1C	FAM100A	GDE1	GM8362	PDE2A		SLC43A2
CORO2A	FAM100B	GFER	GM8374	PDE6A		SLC5A6
CORO2B	FAM136A	GFM1	GM8532	PDE7B		SLC5A7
CORO7	FAM13A	GFM2	GM8558	PDE8B		SLC5A8
COTL1	FAM13C	GFOD1	GM867	PDGFB		SLC5A9
COX11	FAM149A	GFPT1	GM8696	PDGFC		SLC6A11
COX15	FAM149B	GGA3	GM8717	PGM1		SLC6A12
COX16	FAM150B	GGH	GM8767	PGM2		SLC6A6
COX19	FAM158A	GKN3	GM8779	PGM2L1		SLC6A7
COX5B	FAM160A1	GLB1L2	GM8898	PHF19		SLC6A8
CPN1	FAM160A2	GLCCI1	GM8923	PKD2L1		SLC7A11
CPS1	FAM160B1	GM3086	GM8925	PKIB		SLC7A14
CRABP2	FAM163A	GM3150	GM8948	PKM2		SLC7A2
CRAMP1L	FAM163B	GM3160	GM9222	PLEK		SMUG1
CRAT	FAM164B	GM3174	GM9241	PLEK2		SPC25
CRB2	FAM164C	GM3286	GM9292	PLEKHA7		SPEG
CRBN	FAM165B	GM3307	GM9312	PLEKHA8		SPPL3
CRCP	FAM167A	GM3362	GM9525	PLEKHB1		SQSTM1
CRCT1	FAM167B	GM3375	GM9602	POR		SRC
CREB1	FAM189A2	GM3565	GM9603	PPP2R2D		SRGAP2
CRH	FAM18A	GM3711	GM9611	PPP2R3A		SRI
CRHBP	FAM45A	GM3776	GM9684	PPP2R3D		SRR
CRIM1	FAM53B	GM3785	GM9705	PPP2R5D		SRRM2
CRISP1	FAM53C	GM382	GM9735	PPP2R5E		SRRM3
CRISP3	FAM5C	GM3835	GM9745	PPRC1		SRRM4
CRYBA4	FAM65B	GM3851	GM9781	PPTC7		ST8SIA2
CRYL1	FAT1	GM398	GM996	PREX1		STOM
CSGALNACT1	FBL	GM3985	GPAA1	PRKD2		STX2
CSN1S1	FBLN2	GM4028	GPAM	PRKDC		STX3
CSN1S2A	FBP2	GM4066	GRIA3	PTCD3		SUCLG1
CSPG5	FBXL13	GM414	GSTM3	PTRH2		SUDS3
CSPP1	FBXL18	GM4353	GTPBP2	RAB36		SUFU
CSPRS	FBXO5	GM4356	GTPBP3	RAB37		TBL1XR1
CSRNP2	FBXW11	GM4383	GUCY2G	RAB3GAP1		TCF23
CSRNP3	FCHSD2	GM4471	HABP2	RAB43		TCF7L1
CSTB	FCRL1	GM4513	HDAC9	RARS2		TCFAP2B
CSTF1	FCRLS	GM4526	HEATR2	RASAL1		TCFCP2L1
CTLA4	FES	GM4545	HIF3A	RDH9		TEAD4
CWC27	FKBP6	GM4557	HINFP	RDM1		TEC
CWF19L2	FLRT3	GM4565	HSPB7	RELA		TECR
CWH43	FLT3	GM4567	HYAL4	RELB		TECTB
CX3CL1	FLT3L	GM4587	IL22	RETSAT		TMCC3
CX3CR1	FLYWCH1	GM4604	IL22RA2	REV1		TMCO3
CXADR	FUS	GM4659	IL2RB	REV3L		TMCO4
CXCL10	FUT1	GM4689	ISLR2	RHBDF2		TMCO7
CXCL11	FXYD3	GM4698	ISX	RHEBL1		TMED1
CXCL12	FZD5	GM4792	ITFG3	RIN3		TMEM161A
CXCR1	G370120E05RIK	GM4802	KANK3	RIOK3		TMEM163
CXCR5	GALE	GM4835	KANK4	RIPK1		TMOD2
CXCR6	GALNT14	GM4841	KBTBD11	RNF112		TRH
CYB5R2	GALNT7	GM4938	LGI4	RNF122		TRIB1
CYP17A1	GALNTL1	GM4979	LGR5	RNF125		TRIM11
CYP19A1	GALNTL2	GM5064	LHFPL2	RNF144A		TRIM17
CYP1A1	GAS2L1	GM5065	LHPP	RNF150		TRIM23
CYP21A1	GATA2	GM5067	LHX6	RNF157		TRIM25
CYP24A1	GATA4	GM5077	LHX9	RPS19		TRIM30
CYP2A21-PS	GCM1	GM5087	LIF	SDCBP		TRIM8
CYP2A4	GIMAP3	GM5157	LIG3	SDHAF2		TRIM9
CYP2A5	GIMAP5	GM5182	LIG4	SDR42E1		TRIOBP
CYP2AB1	GIMAP6	GM5206	LIMK1	SEC14L3		TRIP12
CYP2B19	GIMAP8	GM5239	LINS2	SEC16B		TTC17
CYP2B23	GLB1	GM5347	LMAN1	SEC22A		TTC9
CYP2C55	GM3193	GM5351	LPAR1	SERPINA3M		TTC9C
CYP2C65	GM3325	GM5384	LPAR2	SERPINB9C		UIMC1
CYP2C66	GM3353	GM5424	LPCAT1	SERPINB9D		ULK1
CYP2D11	GM3435	GM5437	LPIN1	SERPIND1		USP28
CYP2D12	GM3436	GM5442	LPIN2	SETD2		USP29
CYP2D9	GM3464	GM5473	LPIN3	SETD5		USP47
CYP2F2	GM347	GM5504	LSM12	SF3A3		USP49
CYP2J13	GM3618	GM5527	MAK	SFRS8		VAMP2
CYP2J5	GM3837	GM5610	MCM2	SH3GL2		VSX1
CYP2S1	GM3867	GM5614	MCM3AP	SH3KBP1		WBSCR27
CYP3A11	GM3894	GM5686	MFI2	SH3PXD2B		WDHD1
CYP3A16	GM40	GM5738	MICALL2	SIAH1A		WDR82
CYP4A12A	GM4137	GM5785	MOCS1	SIX3		WHSC1
CYP4A12B	GM4157	GM5788	MPL	SIX3OS1		WHSC1L1
CYP4B1	GM4168	GM5827	MPPED2	SIX4		WHSC2
CYP4F14	GM4294	GM5842	MR1	SIX6		WTAP
CYP4F39	GM4349	GM5853	MUDENG	SLC16A13		XKR5
CYP4V3	GM4581	GM5890	MUL1	SLC16A2		ZAN
CYTL1	GM4607	GM5891	MUM1	SLC17A7		ZER1
CYTSA	GM4694	GM5897	MX1	SLC17A8		ZHX3
CYYR1	GM4745	GM5925	MYOM1	SLC1A4		ZNF512B
D0H4S114	GM4773	GM5928	NANOS2	SLC1A7
D130020L05R	GM4864	GM5937	NFATC2IP	SLC22A14
D130043K22R	GM4900	GM5962	NFATC3	SLC25A16
D14ERTD449E	GM4902	GM6014	NFE2L3	SLC30A10
D19BWG1357E	GM4903	GM6090	NKAIN2	SLC30A2
D19WSU162E	GM4987	GM6100	NKTR	SLC30A4
D230025D16R	GM5075	GM6111	NRP	SLC47A2
D2ERTD750E	GM5094	GM6115	NSF	SLC48A1
D330028D13R	GM5155	GM6118	OTOP2	SLC4A1
D330038O06R	GM5158	GM6123	P4HA1	SLC4A10
D330041H03R	GM5191	GM6128	PAN2	SLC4A5
D330045A20R	GM5243	GM6132	PAN3	SLC7A1
D330050I16R	GM5256	GM614	PANC2	SLC7A13
D430018E03R	GM5279	GM6166	PARD6B	SLMO2
D430041D05R	GM5366	GM6176	PARP11	SNRPA1
D430042O09R	GM5461	GM6177	PARP16	SNRPF
D4BWG0951E	GM5464	GM6186	PARP8	SNTA1
D4WSU53E	GM5491	GM6233	PATL2	SRGAP3
D5ERTD577E	GM550	GM6269	PATZ1	SRRD
D5ERTD579E	GM5500	GM6285	PCMT1	STAM
D630003M21R	GM5515	GM6288	PCMTD1	STAM2
D630023F18R	GM5529	GM6293	PCNXL2	STARD5
D630037F22R	GM5533	GM6334	PCSK4	STARD7
D630039A03R	GM5540	GM6335	PCSK5	STARD8
D630045J12R	GM5560	GM6336	PITPNA	STARD9
D6MM5E	GM5586	GM6340	PITPNC1	STAT2
D730002M21R	GM5592	GM6421	PITPNM2	STAT5B
D730039F16R	GM5595	GM6438	POC5	STAU2
D730040F13R	GM5613	GM6473	PODN	STK11IP
D830014E11R	GM5622	GM6485	PODXL	STK24
D830025C05R	GM5643	GM6542	POLD1	STK3
D830030K20R	GM568	GM6551	POLD3	STOML2
D930015E06R	GM5805	GM6557	POLDIP2	STOML3
D930020B18R	GM5822	GM6589	POLE	STON2
D930048N14R	GM5824	GM6592	PPARGC1B	STOX1
D930049A15R	GM5856	GM6635	PPDPF	SYNJ2BP
D9ERTD402E	GM5868	GM6670	PPL	SYNM
DAP	GM5869	GM6722	PPM1E	SYNPO2
DCN	GM5884	GM6747	PPM1F	SYP
DCT	GM5943	GM6749	PPP1R13L	TALDO1
DDX23	GM600	GM6768	PRDM1	TANC1
DDX24	GM6170	GM6781	PTCH1	TANC2
DENND1C	GM6192	GM6790	PTP4A3	TCEANC
DENND2A	GM6204	GM6797	PTPLAD1	TCF7L2
DERA	GM6242	GM6817	REEP2	TCFAP2A
DERL2	GM6251	GM6823	REXO4	TCFAP2C
DGCR14	GM6296	GM6825	RFX2	TDH
DGCR6	GM6313	GM6882	RGMA	TDRD1
DGCR8	GM6320	GM6902	RNF219	TDRD5
DHRS7C	GM6392	GM6945	RSPO2	TECRL
DKK3	GM6396	GM6969	RTN2	TK1
DLX2	GM6415	GM7065	RTN3	TLR9
DLX4	GM6451	GM7083	SALL3	TMEM177
DLX5	GM6478	GM7100	SALL4	TNNC1
DPH1	GM6520	GM7107	SAMD10	TRIB2
DPH2	GM6524	GM7117	SAMD14	TRIM16
DUS2L	GM6532	GM7179	SAMD4	TRIM26
DUSP10	GM6548	GM7181	SAMD8	TRIM3
DUSP14	GM6563	GM7194	SAMHD1	TSR1
DUSP16	GM6578	GM7227	SBNO1	TTC19
DUSP2	GM6583	GM7250	SCARA5	TTF1
DUSP21	GM6624	GM7413	SCARB1	TTF2
DUSP23	GM6723	GM7422	SDC3	TXNL1
DUSP3	GM6744	GM7459	SEC61G	TXNL4A
DUSP4	GM6762	GM7468	SEC63	TXNL4B
DUSP7	GM6767	GM7509	SECISBP2	TXNRD2
DUSP8	GM6789	GM7553	SEPHS1	UBAC1
DUSP9	GM6828	GM7603	SFPQ	UBAP2
DUXBL	GM6843	GM7689	SFRP1	UBE4A
DVL2	GM6877	GM7703	SFRS13B	UBE4B
DVWA	GM6890	GM773	SGCG	UGT3A2
EBAG9	GM6904	GM7755	SI	UHMK1
EBF1	GM6907	GM7782	SIGLECE	UHRF1BP1
EBF2	GM6937	GM7808	SIK2	UQCC
EBF4	GM6958	GM7816	SIK3	UROC1
EBI3	GM7037	GM7842	SIM1	USH1C
ECHDC2	GM7105	GM7843	SIPA1	USH1G
ECHDC3	GM7159	GM7888	SIS	USH2A
EGR1	GM7161	GM7900	SLC10A7	USP53
EGR4	GM7287	GM7984	SLC11A2	USP54
EHBP1	GM7290	GM8007	SLC12A1	UTP6
EHD2	GM7367	GM8029	SLC12A2	VAMP4
EHF	GM7378	GM8031	SLC13A4	VARS
EHMT1	GM7434	GM8045	SLC15A1	VASH2
EIF4EBP2	GM7534	GM8069	SLC22A2	VWF
EIF4G1	GM7574	GM8095	SLC39A11	WARS
EIF4G2	GM7591	GM8112	SLC39A13	WASF2
EIF5A	GM7600	GM8137	SLC7A4	WASF3
EIF5A2	GM7629	GM8146	SLC7A6	WBP11
EIF5B	GM7664	GM8158	SLC8A1	WDR3
EIF6	GM7776	GM8188	SLC8A2	WDR31
ELAC1	GM7832	GM8203	SMURF1	WDR34
ELK3	GM7839	GM8258	SOCS3	WDR37
ELK4	GM7848	GM826	SPEN	WDR45L
EMP3	GM7850	GM8264	SPESP1	WNT10B
EMR1	GM7862	GM8288	SREBF2	YDJC
EMR4	GM7966	GM8300	SSRP1	ZCCHC9
EN2	GM7995	GM8317	SSTR1	ZDHHC14
ENAH	GM7996	GM8332	STK38L	ZDHHC15
ENC1	GM8037	GM8390	SUMF2	ZDHHC20
ENDOD1	GM807	GM8394	SYCP2	ZDHHC23
ENDOU	GM8160	GM8423	SYT17	ZDHHC8
ENHO	GM8420	GM8430	SYT2	ZEB2
ENTPD4	GM8429	GM8512	TBX18	ZFC3H1
ENTPD5	GM8539	GM853	TCFCP2	ZFHX2
ENTPD7	GM8652	GM8554	TCFE3	ZFHX3
EPGN	GM8680	GM8563	TECTA	ZFHX4
EPN2	GM8700	GM8594	TLR13
EPN3	GM8765	GM8649	TLR4
EPO	GM8786	GM8663	TMEM164
EPOR	GM88	GM8708	TMEM174
EPS15	GM8885	GM8759	TMEM188
EPS8	GM8960	GM8778	TMEM194
EPS8L3	GM8981	GM8797	TMEM45B
EPT1	GM9000	GM8807	TMEM52
EPX	GM9008	GM8810	TPM2
ERAL1	GM9026	GM8850	TPR
ERAP1	GM9027	GM8884	TPRGL
ERBB3	GM9029	GM8967	TPRKB
ERBB4	GM9030	GM9012	TPRN
ERC1	GM9032	GM9014	TPST2
ESRRG	GM9040	GM9050	TPX2
EXT2	GM9044	GM9154	TRIM10
EXTL3	GM9045	GM9169	TRIM27
EYA4	GM9046	GM9173	TTC18
F630003A18R	GM9048	GM9174	TTLL7
F630043A04R	GM9049	GM9228	TUBGCP6
F630110N24R	GM9058	GM9396	UACA
F730047E07R	GM906	GM9401	UBA1
F8	GM9359	GM9416	UBR7
F830045P16R	GM9364	GM9437	USP18
F8A	GM9620	GM9480	USP25
F9	GM9634	GM9504	VAT1
FADS3	GM9663	GM9511	VAT1L
FAF2	GM9686	GM9514	VAV3
FAHD2A	GM9722	GM960	WDR12
FAIM2	GM9816	GM962	WDR13
FAIM3	GM9825	GM9731	WDR4
FAM107B	GM9880	GM9761	WDR41
FAM108A	GM9903	GM9782	WDR43
FAM109A	GMPPB	GM9923	WDR86
FAM109B	GOLGA5	GMDS	WHRN
FAM110B	GOLGA7	GMEB1	WNT8B
FAM113A	GOLPH3L	GNB1L	WNT9A
FAM114A2	GOLT1B	GPI1	WNT9B
FAM115A	GON4L	GPLD1	ZCCHC24
FAM115C	GOPC	GPR39	ZCCHC4
FAM116A	GORASP1	GPR61	ZCCHC6
FAM116B	GORASP2	GRID1	ZCCHC7
FAM125A	GOSR1	GRID2IP	ZFAND1
FAM125B	GOSR2	GRIK1	ZFAND3
FAM126A	GOT2	GRIN2C	ZFP161
FAM126B	GPAT2	GRIN3A	ZFP169
FAM129A	GPATCH8	GSTA4	ZFP174
FAM129B	GPBP1	GSTCD	ZFP180
FAM131B	GPR18	H3F3A	ZFP184
FAM171A2	GPR180	H3F3B	ZFP192
FAM174B	GPR20	H3F3C	ZFP202
FAM175B	GPR22	HACL1	ZFP217
FAM178A	GPR84	HAS1	ZFP248
FAM179A	GRK6	HAS3	ZFP263
FAM179B	GRLF1	HAT1	ZFP275
FAM184B	GRM2	HAUS2	ZFP281
FAM18B	GRM3	HBB-Y	ZFP282
FAM190A	GRM5	HBEGF	ZFP295
FAM192A	GRM6	HBP1	ZFP319
FAM193A	GRSF1	HBS1L	ZFP324
FAM195B	GRTP1	HC	ZFP329
FAM198A	GSDMA3	HCCS	ZFP335
FAM214A	GSDMD	HCN3	ZFP346
FAM23A	GSE1	HCRTR1	ZFP362
FAM49A	GSR	HCRTR2	ZFP365
FAM55B	GSTM4	HEMK1	ZFP384
FAM57A	GTF2A1L	HEPACAM2	ZFP385A
FAM63A	GTF2H3	HEPH	ZFP385B
FAM71E2	GTPBP4	HERC1	ZFP385C
FAM78B	HAO2	HERC2	ZFP397
FAM81A	HAP1	HERC3	ZFP407
FAM82A1	HAPLN1	HHATL	ZFP426
FAM83A	HAPLN2	HHIPL1	ZFP445
FAM83F	HDC	HNRNPM	ZFP449
FAM83G	HECA	HNRNPU	ZFP458
FAM83H	HECTD3	HNRNPUL2	ZFP46
FAM84A	HECW2	HOXA10	ZFP462
FAM84B	HEG1	HOXA9	ZFP472
FAM86	HERPUD2	HOXB1	ZFP507
FAM98A	HNRPLL	HS6ST1	ZFP512
FAM98B	HPD	ID1	ZFP541
FANCA	HSD17B4	IDUA	ZFP560
FANCC	HSD3B1	IFI204	ZFP563
FANCD2	HSD3B2	IFI205	ZFP575
FASL	HSD3B3	IFI30	ZFP59
FASN	HSD3B5	IFI44	ZFP592
FASTKD2	HSD3B6	IFIT2	ZFP595
FBLIM1	HSPB6	IFIT3	ZFP597
FBLN1	HSPB9	IGF1	ZFP599
FBRSL1	HSPG2	IGF1R	ZFP60
FBXL4	HTATIP2	IGF2	ZFP607
FBXL5	HYAL3	IGFBPL1	ZFP608
FBXL6	IGFALS	IGHMBP2	ZFP616
FBXL7	IL22RA1	IGSF6	ZFP617
FBXL8	IL27	IGSF9B	ZFP618
FBXO47	IL2RA	IL2RG	ZFP619
FCER2A	INHA	IL31RA	ZFP629
FCF1	INHBA	IL33	ZFP641
FCGBP	INHBB	ILF2	ZFP644
FCGR3	INO80	ISM1	ZFP646
FCGR4	INO80E	ISOC1	ZFP652
FCGRT	INPP4A	ISY1	ZFP687
FDXR	INPP5D	JAK2	ZFP704
FECH	INTS9	JAK3	ZFP710
FGF15	INTU	JOSD2	ZFP715
FGF16	INVS	JPH1	ZFP719
FGF18	IP6K1	JPH3	ZFP735
FGF23	IPCEF1	JTB	ZFP74
FGF7	IPMK	JUB	ZFP748
FGGY	IPO11	KEAP1	ZFP758
FGL2	IPO13	KHDRBS1	ZFP759
FGR	IPO4	KHDRBS2	ZFP775
FHL5	IPO9	KIF15	ZFP78
FIBCD1	IPPK	KIF1A	ZFP780B
FIBIN	IQGAP3	KLHL25	ZFP784
FIZ1	IQSEC1	KLHL28	ZFP799
FKBP14	IQSEC2	KMO	ZFP825
FKBP15	IQSEC3	LASS2	ZFP827
FKBP1A	IQUB	LASS6	ZFP831
FKBP1B	IRG1	LATS1	ZFP84
FLOT2	IRGQ	LATS2	ZFP867
FMN1	IRS1	LAX1	ZFP870
FMN2	IRS3	LDHC	ZFP879
FMNL2	IRS4	LDOC1	ZFP91-CNTF
FMO2	IRX1	LENEP	ZFP92
FMO4	ITGA2B	LENG8	ZMPSTE24
FMO5	ITGA3	LEP
FMO9	ITGA4	LEPR
FMR1	ITGA5	LEPREL1
FOXC1	ITGAX	LIPE
FOXC2	ITGB1	LIPH
FOXD2	ITGB1BP1	LIPI
FOXF2	ITGB1BP2	LIPM
FOXK2	ITGB1BP3	LIPT2
FOXN2	ITGB2L	LITAF
FOXO6	ITGB3	LMAN2
FOXP1	KBTBD5	LMAN2L
FOXP2	KBTBD7	LMBR1
FOXP3	KBTBD8	LMBRD1
FRG1	KCMF1	LMNB1
FRMPD3	KCNA1	LMNB2
FRMPD4	KCNA2	LMOD3
FRZB	KCNA4	LNX1
FST	KCNA6	LOC10003894
FTCD	KCNC1	LOC10003899
FTL1	KCNG4	LOC10003900
FTL2	KCNH1	LOC10003901
FUCA1	KCNIP2	LOC10003902
FUCA2	KCNJ8	LOC10003903
FUT7	KCNJ9	LOC10003908
GABBR2	KCNK13	LOC10003909
GAL3ST4	KCNK16	LOC10003915
GALC	KCNK18	LOC10003918
GAP43	KCNK2	LOC10003921
GAPDH	KCNK3	LOC10004011
GAPT	KLF15	LOC10004012
GAS2L3	KLF17	LOC10004095
GAS7	KLF3	LOC10004099
GATA3	KLHDC7A	LOC10004108
GC	KLHDC8A	LOC10004145
GCAP14	KLHDC8B	LOC10004146
GCKR	LAMB2	LOC10004148
GDAP2	LAMB3	LOC10004149
GDF10	LAMC3	LOC10004151
GDF11	LAMP1	LOC10004152
GDF2	LARP4	LOC10004164
GDF5	LARP6	LOC10004167
GDF6	LARP7	LOC10004171
GDF9	LARS	LOC10004180
GDNF	LAT	LOC10004190
GEMIN5	LAT2	LOC10004201
GEMIN7	LBH	LOC10004202
GET4	LBP	LOC10004391
GFRA2	LBX1	LOC10004392
GGCX	LBXCOR1	LOC10004396
GIYD2	LCA5L	LOC10004397
GJA1	LCN13	LOC10004398
GJA10	LCOR	LOC10004399
GJA6	LCORL	LOC10004400
GJB2	LEPROT	LOC10004401
GJB3	LEPROTL1	LOC10004402
GJB5	LETM2	LOC10004403
GLB1L3	LGALS12	LOC10004404
GM3033	LGALS3BP	LOC10004405
GM3043	LGTN	LOC10004406
GM3192	LILRA5	LOC10004410
GM3278	LIMK2	LOC10004411
GM3393	LIMS1	LOC10004412
GM3411	LIMS2	LOC10004413
GM3443	LIN28B	LOC10004414
GM3486	LIN7A	LOC10004415
GM3532	LMO4	LOC10004416
GM3537	LRRC48	LOC10004420
GM3543	LRRC49	LOC10004421
GM3554	LRRC8E	LOC10004422
GM3573	LRRFIP2	LOC10004423
GM3644	LRRN4	LOC10004424
GM3650	LRRN4CL	LOC10004426
GM3670	LRTM2	LOC10004427
GM3676	LRWD1	LOC10004429
GM3755	LYN	LOC10004430
GM3864	LYPD1	LOC10004431
GM4011	LYPD4	LOC10004432
GM410	LYPD5	LOC10004433
GM4181	LYPD6B	LOC10004434
GM4482	LYPLA1	LOC10004435
GM4583	LYPLAL1	LOC10004436
GM4600	MAEL	LOC10004437
GM4684	MAL	LOC10004438
GM4687	MAN2B1	LOC10004440
GM4692	MANBAL	LOC10004443
GM4763	MANEAL	LOC10004446
GM4815	MAP1LC3A	LOC10004450
GM4827	MAP2K5	LOC10004452
GM4833	MAPT	LOC10004453
GM4859	2018-03-01	LOC10004454
GM4880	2018-03-04	LOC10004456
GM4893	2018-03-06	LOC10004457
GM4922	2018-03-09	LOC10004459
GM4949	MARK3	LOC10004460
GM5113	MARK4	LOC10004464
GM5128	MARVELD1	LOC10004467
GM5134	MARVELD2	LOC10004468
GM5149	MAS1	LOC10004471
GM5207	MATK	LOC10004472
GM5217	MATN1	LOC10004474
GM5224	MBD3	LOC10004475
GM5334	MBD3L1	LOC10004476
GM5451	MBD4	LOC10004477
GM5490	MBD5	LOC10004484
GM5551	MBNL1	LOC10004485
GM5628	MCM3	LOC10004486
GM5705	MCM5	LOC10004487
GM5790	MCM7	LOC10004488
GM5800	MCM9	LOC10004493
GM5809	MCPT1	LOC10004494
GM5847	MCPT2	LOC10004495
GM5905	MCPT8	LOC10004496
GM5911	MCTP2	LOC10004497
GM5931	MMGT2	LOC10004498
GM5941	MMP11	LOC10004501
GM6028	MOCOS	LOC10004502
GM6084	MPP7	LOC10004503
GM6086	MRAP	LOC10004506
GM6226	MSN	LOC10004512
GM6238	MTA1	LOC10004514
GM628	MTAP1B	LOC10004515
GM6374	MTAP4	LOC10004516
GM6379	MTAP6	LOC100045191
GM6381	MTAP7D1	LOC10004520
GM6382	MUM1L1	LOC10004521
GM6385	MUP1	LOC10004522
GM6388	MUP10	LOC10004523
GM6450	MUP11	LOC10004524
GM6522	MUP12	LOC10004528
GM6657	MUP13	LOC10004529
GM6725	MUP14	LOC10004532
GM6728	MUP15	LOC10004534
GM6756	MUP16	LOC10004535
GM6776	MUP17	LOC10004544
GM6811	MUP18	LOC10004549
GM70	MUP19	LOC10004554
GM7008	MUP2	LOC10004558
GM7052	MUP7	LOC10004561
GM7054	MUP8	LOC10004562
GM7168	MUP9	LOC10004565
GM7236	MUS81	LOC10004567
GM7270	MUTYH	LOC10004568
GM7304	MXD1	LOC10004569
GM7318	MXD3	LOC10004574
GM7353	MXI1	LOC10004575
GM7356	MXRA7	LOC10004576
GM7358	MYB	LOC10004577
GM7368	MYCT1	LOC10004578
GM7424	MYH11	LOC10004579
GM7457	MYO9B	LOC10004583
GM7625	MYOC	LOC10004584
GM7655	MYOCD	LOC10004585
GM7669	MYOM2	LOC10004588
GM7684	MYOM3	LOC10004590
GM7732	MYOZ1	LOC10004592
GM7736	MYPN	LOC10004595
GM7742	NANP	LOC10004596
GM7749	NAPSA	LOC10004598
GM7849	NAT1	LOC10004600
GM7861	NAT14	LOC10004601
GM7901	NAT15	LOC10004602
GM7903	NAT2	LOC10004603
GM7932	NAT6	LOC10004605
GM7971	NAT8	LOC10004606
GM7978	NAT8B	LOC10004608
GM8023	NAT8L	LOC10004609
GM8050	NAV1	LOC10004611
GM806	NAV2	LOC10004612
GM8096	NAV3	LOC10004613
GM8173	NBAS	LOC10004616
GM8231	NBEA	LOC10004620
GM8271	NBEAL1	LOC10004621
GM8341	NBEAL2	LOC10004623
GM8387	NBL1	LOC10004625
GM8560	NCALD	LOC10004626
GM8662	NCAM1	LOC10004628
GM8729	NCAPD2	LOC10004629
GM8787	NCOR2	LOC10004632
GM8806	NDFIP1	LOC10004634
GM8934	NDNL2	LOC10004635
GM8959	NDP	LOC10004641
GM9112	NFKBIL1	LOC10004643
GM9138	NFKBIL2	LOC10004651
GM9180	NFRKB	LOC10004655
GM9182	NFX1	LOC10004656
GM9210	NFYC	LOC10004657
GM9214	NGDN	LOC10004663
GM9234	NGFR	LOC10004664
GM9252	NKAPL	LOC10004668
GM9298	NKPD1	LOC10004669
GM9299	NKX2-1	LOC10004670
GM9347	NKX2-3	LOC10004673
GM9349	NKX2-9	LOC10004674
GM9387	NKX3-1	LOC10004676
GM9430	NOL3	LOC10004677
GM949	NOL4	LOC100046781
GM9493	NOP2	LOC10004679
GM9616	NOP56	LOC10004680
GM9725	NOP58	LOC10004682
GM9746	NOS1	LOC10004685
GM9788	NOTCH2	LOC10004686
GM9789	NOTCH3	LOC10004687
GM9791	NOTCH4	LOC10004689
GM9793	NOTUM	LOC10004691
GM9795	NOV	LOC10004693
GM9801	NOVA1	LOC10004694
GM9803	NPAS4	LOC10004695
GM9836	NPAT	LOC10004700
GM9885	NPC2	LOC10004701
GM9918	NPPB	LOC10004702
GM9991	NPTX2	LOC10004703
GNB3	NPW	LOC10004705
GNL1	NPY	LOC10004706
GNL3L	NR1H4	LOC10004708
GNPTG	NR1H5	LOC10004709
GOLGA1	NRBP1	LOC10004710
GOLGA2	NRBP2	LOC10004713
GOLGA3	NSG1	LOC10004714
GPD1	NSUN4	LOC10004717
GPD2	NSUN5	LOC10004718
GPHA2	NUDT19	LOC10004719
GPHB5	NUFIP2	LOC10004722
GPR37L1	NUMA1	LOC10004723
GRIA4	OPLAH	LOC10004724
GRIK3	OPN1SW	LOC10004728
GRINA	OPN4	LOC10004730
GRINL1A	OPRD1	LOC10004731
GRIP1	OPRK1	LOC10004734
GRK1	ORAI1	LOC10004735
GRK4	ORAI3	LOC10004736
GSTM6	ORF63	LOC10004737
GSTT1	ORM2	LOC10004738
GSTT3	ORMDL1	LOC10004739
GSX1	ORMDL2	LOC10004742
GTPBP5	OSBPL6	LOC10004743
GUF1	PARD6G	LOC10004744
GULO	PAX8	LOC10004746
GVIN1	PAX9	LOC10004747
GXYLT1	PCK2	LOC10004748
GXYLT2	PCLO	LOC10004749
GYG	PDZK1IP1	LOC10004750
GYK	PEA15A	LOC10004751
HAGH	PEMT	LOC10004752
HDGFL1	PEO1	LOC10004753
HDGFRP2	PER1	LOC10004756
HDGFRP3	PER2	LOC10004757
HDHD3	PHF13	LOC10004758
HDLBP	PHF15	LOC10004760
HDX	PITPNB	LOC10004761
HEATR3	PLA1A	LOC10004763
HES1	PLA2G10	LOC10004764
HES2	PLA2G4E	LOC10004765
HES3	PLA2G4F	LOC10004766
HES7	PLBD1	LOC10004767
HESX1	PLBD2	LOC10004769
HEXA	PLCB1	LOC10004770
HEXIM1	PLCB2	LOC10004771
HFM1	PLG	LOC10004772
HGSNAT	PLK1S1	LOC10004773
HHLA1	PNCK	LOC10004774
HIATL1	PNMA3	LOC10004777
HIC2	PNN	LOC10004778
HIF1A	POC1A	LOC10004779
HIPK1	PODXL2	LOC10004780
HIST1H1D	POF1B	LOC10004781
HIST1H2AL	POFUT1	LOC10004782
HIST2H2AA1	POFUT2	LOC10004783
HIST2H2AA2	POGK	LOC10004784
HIST2H3C1	POGZ	LOC10004785
HIST2H3C2	POLG	LOC10004786
HIVEP1	POLI	LOC10004788
HMOX1	POLL	LOC10004789
HMX1	POLM	LOC10004792
HMX2	POLQ	LOC10004793
HN1	POLR1A	LOC10004794
HN1L	POLR1C	LOC10004796
HNF1B	POLR3B	LOC10004799
HNF4A	POLR3F	LOC10004801
HNRNPA3	POLR3G	LOC10004802
HPCAL1	POLR3GL	LOC10004804
HPCAL4	POLRMT	LOC10004805
HPRT	POM121	LOC10004806
HPS1	POM121L2	LOC10004807
HPS3	POMGNT1	LOC10004808
HPS5	POMP	LOC10004810
HPSE	POMT2	LOC10004811
HPSE2	PON3	LOC10004812
HR	POP1	LOC10004813
HRAS1	PORCN	LOC10004814
HRASLS	PPAT	LOC10004816
HRH1	PPCDC	LOC10004820
HRH3	PPIB	LOC10004822
HRK	PPIC	LOC10004823
HRNR	PPIE	LOC10004825
HS2ST1	PPIG	LOC10004827
HS3ST2	PPIH	LOC10004829
HS3ST3A1	PPIL1	LOC10004831
HS3ST3B1	PPIL3	LOC10004832
HSD17B1	PPP2R5A	LOC10004833
HSD17B11	PPP3CA	LOC10004834
HSD17B12	PPP3R2	LOC10004836
HSD17B13	PPP4C	LOC10004837
HSF1	PRDM10	LOC10004840
HSPA1L	PRKRIP1	LOC10004841
HSPA9	PRL7D1	LOC10004843
HSPB1	PRND	LOC10004844
HSPB8	PRPF4	LOC10004847
HYAL6	PRR9	LOC10004848
HYDIN	PRRC1	LOC10004849
HYLS1	PRRXL1	LOC10004850
ICK	PRSS32	LOC10004852
ICOSL	PRSS39	LOC10004853
IGFBP3	PRSSL1	LOC10004855
IGLON5	PRTG	LOC10004857
IL10	PRUNE2	LOC10004858
IL10RA	PSAP	LOC10004860
IL10RB	PSAT1	LOC10004861
IL12A	PTBP1	LOC10004864
IL12RB2	PTPLAD2	LOC10004865
IL17D	PTS	LOC10004866
IL17F	PTTG1	LOC10004868
IL17RA	PUSL1	LOC10004869
IL17RB	PYGB	LOC10004870
IL17RD	PYGM	LOC10004872
IL18BP	PYGO1	LOC100048721
IL18R1	PYGO2	LOC10004874
IL18RAP	QDPR	LOC10004875
IL1A	RAB9B	LOC10004881
IL1F5	RAC1	LOC10004882
IL1F6	RAC2	LOC10004883
IL1F9	RARA	LOC10004884
IL1R1	RARB	LOC10004885
IL20RA	RARG	LOC10004886
IL20RB	RASD1	LOC10004887
IL21	RASD2	LOC10004888
IL23R	RASEF	LOC10004908
IL25	RASGRF1	LOC102641522
INA	RBM38	LOC102641811
INADL	RBM4B	LOC231914
INCA1	RBM6	LOC382022
INF2	RBM7	LOC384595
INF2Q	REL	LOC433064
JAKMIP1	RFC3	LOC544757
JAKMIP2	RFX1	LOC545974
JPH4	RFXANK	LOC546233
KALRN	RFXAP	LOC547041
KANK1	RGN	LOC547338
KDSR	RGNEF	LOC547345
KIAA1486	RGS12	LOC547385
KIF16B	RIOK1	LOC621779
KLHL30	RNF168	LOC627908
KLHL31	RNF17	LOC628409
KLHL32	RNF170	LOC629952
KLHL38	RNF183	LOC630401
KLHL4	RNF187	LOC630507
KLHL6	RNF19A	LOC630607
KLHL9	RNF19B	LOC630658
KLK10	RPL32	LOC630671
KLK11	RPS14	LOC630737
KLK9	RPS3A	LOC630751
KLRA1	RSRC1	LOC630855
KLRA15	RUNX1	LOC631204
KLRA16	RUNX2	LOC631217
KLRA18	SAMD1	LOC631286
KLRA2	SAMD7	LOC631505
KLRA22	SAMD9L	LOC631742
KLRA25	SAMM50	LOC631743
KLRA33	SBNO2	LOC631806
KLRA4	SCCPDH	LOC632045
KLRB1A	SCD1	LOC632297
KLRB1B	SCUBE2	LOC632383
KLRB1C	SCUBE3	LOC632398
KLRG1	SEC24B	LOC632433
KLRG2	SEC24D	LOC632530
KLRI2	SEC62	LOC632664
KLRK1	SEMA4B	LOC632682
L7RN6	SEMA5B	LOC632805
LAD1	SEMA6A	LOC632847
LAMA2	SENP5	LOC632959
LAMB1-1	SENP7	LOC633016
LDB3	SESN1	LOC633219
LDLR	SESN2	LOC633467
LDLRAD2	SESTD1	LOC633703
LDLRAD3	SFRS14	LOC633778
LGR4	SFRS15	LOC633908
LGR6	SFRS17B	LOC634102
LHCGR	SHISA4	LOC634148
LHFPL4	SHISA6	LOC634286
LHFPL5	SIGLECH	LOC634417
LILRB3	SIGMAR1	LOC634496
LIMA1	SIKE1	LOC634555
LIMCH1	SIM2	LOC634585
LIMD1	SIPA1L2	LOC634943
LIN7B	SIRPA	LOC635180
LIN9	SIRT2	LOC635418
LINGO1	SIRT7	LOC635513
LINGO2	SLC14A1	LOC635773
LINGO3	SLC14A2	LOC635886
LIPA	SLC25A28	LOC636537
LMBRD2	SLC25A29	LOC636649
LMCD1	SLC25A32	LOC636856
LOH12CR1	SLC25A37	LOC637118
LONRF1	SLC25A45	LOC637280
LONRF2	SLC25A46	LOC637553
LONRF3	SLC25A5	LOC637711
LOXL1	SLC29A4	LOC637733
LOXL4	SLC2A10	LOC637754
LPAR3	SLC2A12	LOC637796
LPAR6	SLC2A13	LOC638024
LPCAT3	SLC2A5	LOC638050
LPCAT4	SLC2A6	LOC638148
LPL	SLC9A1	LOC638399
LPO	SLC9A3R1	LOC638440
LPXN	SMAGP	LOC638642
LRBA	SMAP1	LOC638710
LRDD	SMAP2	LOC638800
LRRC19	SMG6	LOC638935
LRRC2	SMG7	LOC639171
LRRC20	SOCS1	LOC639384
LRRC33	SOCS7	LOC639477
LRRC36	SPECC1	LOC639541
LRRC38	SRA1	LOC639777
LRRC39	SRBD1	LOC639986
LRRC43	SRCRB4D	LOC640053
LRRC45	SSR4	LOC640248
LTA	SSTR2	LOC640346
LTA4H	SSTR3	LOC640369
LTB4R2	SUSD2	LOC640441
MAGEE1	SUSD3	LOC640746
MAGMAS	SYF2	LOC640757
MAL2	TAF15	LOC640794
MAT2A	TAF1B	LOC640877
MAT2B	TAF1C	LOC640965
MCOLN3	TAF2	LOC640972
MCPH1	TAPT1	LOC641106
MDH2	TARDBP	LOC641136
MDM1	TAS1R2	LOC641240
MEOX1	TAS1R3	LOC664986
MEP1A	TAT	LOC665290
MEP1B	TATDN2	LOC665718
MEPCE	TBC1D19	LOC668231
MESP2	TBC1D2	LOC669888
MET	TBPL2	LOC671440
MFAP4	TBR1	LOC671548
MFGE8	TBRG4	LOC672215
MFHAS1	TBX21	LOC673151
MFNG	TBX22	LOC673152
MFSD1	TBX6	LOC673550
MFSD5	TCAM1	LOC674157
MFSD7C	TCAP	LOC674161
MFSD9	TCF4	LOC674168
MGA	TCF7	LOC674229
MGAT1	TCFL5	LOC674236
MID1IP1	TCL1	LOC674241
MID2	TCP10	LOC674345
MIER3	TCP10A	LOC674368
MMP1A	TCP10B	LOC674449
MMP1B	TCP10C	LOC674493
MMP23	TCP11	LOC674507
MOBKL2B	TCP11L1	LOC674543
MORN5	TCTE2	LOC674654
MPP6	TENM3	LOC674678
MRGPRB2	TERF2IP	LOC674691
MRGPRD	THRA	LOC674773
MRGPRF	THRAP3	LOC674958
MRGPRX1	TJAP1	LOC675001
MRPL39	TJP1	LOC675018
MSI1	TJP3	LOC675056
MSL1	TM9SF1	LOC675366
MSL2	TM9SF2	LOC675448
MSL3	TM9SF4	LOC675516
MSLNL	TMCC1	LOC675521
MSTN	TMCC2	LOC675543
MTMR11	TMED4	LOC675560
MUP-PS11	TMEFF2	LOC675562
MUP-PS19	TMEM104	LOC675567
MUP20	TMEM175	LOC675709
MUP3	TMEM200A	LOC675768
MUP4	TMEM201	LOC675809
MUP5	TMEM50A	LOC675955
MX2	TMEM51	LOC675981
MYH13	TMEM55B	LOC676013
MYH14	TMEM56	LOC676024
MYL2	TMUB2	LOC676142
MYL6B	TNFRSF10B	LOC676173
MYLK	TNFRSF11A	LOC676296
MYLK2	TNFRSF14	LOC676337
MYLPF	TNFRSF19	LOC676449
MYNN	TNFRSF1B	LOC676463
MYO16	TNFRSF21	LOC676674
MYO18A	TNFRSF22	LOC676708
MYO18B	TNFRSF26	LOC676710
MYPOP	TNFRSF9	LOC676813
MYSM1	TNFSF10	LOC676880
MYST2	TNIK	LOC676960
MYST3	TNK1	LOC677008
MYST4	TNKS2	LOC677017
MYT1	TNP1	LOC677025
NAGK	TOB2	LOC677083
NAIP1	TOE1	LOC677143
NAIP1-RS1	TPM3	LOC677213
NAIP2	TPST1	LOC677235
NAIP3	TRAPPC3	LOC677344
NAIP4	TRCG1	LOC677366
NAIP5	TREM1	LOC677374
NAIP6	TREM2	LOC677395
NAIP7	TREML2	LOC677429
NALCN	TREX2	LOC677441
NANOG	TRIB3	LOC677447
NANOGPD	TRIM14	LOC677558
NANOS1	TRIM15	LOC677578
NDRG2	TRIM29	LOC677631
NDRG3	TRIP13	LOC677637
NEK6	TRIP4	LOC677644
NELF	TRIT1	LOC68395
NEU1	TRMT11	LSM7
NEU2	TRMT2A	LYSMD3
NEU3	TRMT2B	LYST
NEU4	TRMT5	LYZ1
NEURL1A	TRMT6	LYZ2
NEUROD2	TRMT61A	LZTR1
NEUROD6	TRP53	MAGEA10
NEUROG2	TRP53BP1	MAGEB18
NEXN	TRP53BP2	MAGEB3
NFASC	TRP53I11	MAGEE2
NFAT5	TRP63	MAGEH1
NFATC4	TSX	MAGI1
NGB	TTC21B	MAGI2
NIT1	TTC22	MAGI3
NKAIN1	TTC23L	MAP3K11
NKAIN3	TTC24	MAP3K12
NKRF	TTC26	MAP4K4
NONO	TTC28	MAP4K5
NOP16	TTC30A1	MAP6D1
NPY6R	TTC39B	MAPK11
NRSN2	TTC39D	MAPK12
NRXN2	TTC7	MAPK14
NRXN3	TTC7B	MATN4
NT5M	TTK	MAX
NTF3	TTL	MAZ
NTF5	TTLL6	MBD2
NTRK1	TTLL9	MBOAT1
NTRK2	TTN	MCCC2
NTS	TTYH3	MCEE
NTSR1	TUB	MED18
NTSR2	TUBA3A	MED22
NUAK1	TUBA3B	MED7
NUB1	TUBA4A	MEGF8
NUBP2	TUBA8	MEGF9
NUCB2	TUFM	MEI1
NUCKS1	UAP1L1	MEIS2
NUDCD3	UBL7	MELK
NUDT10	UBTD1	METTL2
NUDT11	UBTD2	METTL5
NUDT12	UBTF	METTL6
NUDT13	UBTFL1	METTL7A2
NUDT16	UBXN11	METTL7A2-HI
NUP43	UBXN2A	METTL8
NUP62	UBXN2B	MFSD11
NWD1	UBXN4	MFSD3
NXF1	UQCRFS1	MGAT2
NXF3	USP3	MGAT3
NYX	USP30	MGAT5
OAF	USP40	MGAT5B
OAS1B	USP42	MMP12
OAS1C	USP43	MMP13
OAS1G	VAC14	MMP7
OAS2	VAMP1	MNAT1
OAS3	VAV1	MNX1
OAZ2	VPS33B	MOGAT2
OBFC2A	VPS52	MORC2B
OCIAD2	VPS8	MORC3
OCLN	VSIG10L	MORF4L1
OCRL	VSIG2	MOS
ODC1	VWA2	MOSC1
ODF2	VWA3A	MOV10L1
ODZ2	VWA5B1	MPDZ
ODZ4	WBSCR17	MPHOSPH6
OGDH	WBSCR22	MPHOSPH9
OGDHL	WBSCR25	MPST
OGFOD1	WBSCR28	MPV17
OGFR	WDR19	MPV17L
OGFRL1	WDR91	MPZL1
OGG1	XKR6	MREG
OGT	XRCC6BP1	MRGPRA3
OLFR1020	XRN1	MRGPRA6
OLFR108	XRN2	MRI1
OLFR1140	XRRA1	MRPL10
OLFR119	ZAR1	MRPL15
OLFR121	ZBED3	MRPL40
OLFR127	ZBTB24	MRPL45
OLFR128	ZBTB26	MRPS10
OLFR13	ZBTB32	MRPS16
OLFR133	ZBTB33	MRPS17
OLFR1344	ZBTB34	MRPS18B
OLFR1354	ZBTB40	MRPS33
OLFR1389	ZBTB44	MS4A4B
OLFR1426	ZFP1	MS4A4D
OLFR1431	ZFP101	MSH3
OLFR1508	ZFP106	MSMB
OLFR166	ZFP108	MT4
OLFR18	ZFP11	MTA2
OLFR212	ZFP111	MTAP2
OLFR235	ZFP120	MTG1
OLFR237-PS1	ZFP142	MTHFD1L
OLFR245	ZFP143	MTMR12
OLFR248	ZFP148	MTMR15
OLFR281	ZFP187	MUC2
OLFR354	ZFP191	MUC20
OLFR441	ZFP207	MUC5AC
OLFR536	ZFP235	MUC5B
OLFR613	ZFP239	MUT
OLFR64	ZFP259	MUTED
OLFR65	ZFP276	MVP
OLFR654	ZFP286	MYBBP1A
OLFR69	ZFP292	MYH8
OLFR70	ZFP3	MYH9
OLFR701	ZFP318	MYO1G
OLFR742	ZFP326	MZF1
OLFR77	ZFP330	N28178
OLFR78	ZFP345	N4BP1
OLFR930	ZFP354B	N4BP2
OLFR960	ZFP358	N4BP2L1
OLFR996	ZFP367	N4BP2L2
OLIG1	ZFP39	N6AMT1
OLIG2	ZFP42	NAA11
OLR1	ZFP429	NAPEPLD
OTOR	ZFP454	NARG2
OTOS	ZFP459	NASP
P2RY6	ZFP474	NCAN
PAH	ZFP523	NCAPH2
PAIP1	ZFP526	NCKIPSD
PAIP2B	ZFP536	NCLN
PAK2	ZFP600	NCOA1
PAK3	ZFP606	NDST2
PAK6	ZFP609	NDST3
PANK1	ZFP623	NDUFA3
PANK3	ZFP637	NDUFA4
PANK4	ZFP655	NDUFS3
PANX3	ZFP663	NDUFS4
PAQR3	ZFP664	NEB
PAQR4	ZFP667	NEBL
PARD6A	ZFP689	NECAB1
PARK7	ZFP691	NECAP1
PARM1	ZFP71-RS1	NECAP2
PARP14	ZFP711	NEDD1
PARP3	ZFP740	NEDD4
PARPBP	ZFP747	NEDD4L
PARS2	ZFP760	NEIL1
PARVB	ZFP763	NEIL2
PARVG	ZFP770	NEK11
PCDH19	ZFP772	NEK3
PCDHA3	ZFP773	NEK4
PCDHB10	ZFP787	NFE2
PCDHB13	ZFP808	NFE2L1
PCDHB14	ZFP81	NFIC
PCDHB16	ZFP810	NPY2R
PCDHB17	ZFP94	NR1D1
PCDHB2	ZFP97	NR1D2
PCDHB21	ZFPL1	NRADD
PCDHB22	ZFPM1	NRAP
PCDHB3	ZMAT5	NSUN2
PCDHB4	ZMIZ1	NSUN3
PCDHB5	ZMIZ2	NUFIP1
PCDHB7	ZMYND19	NUP210
PCGF3	ZMYND8	NUP214
PCSK6	ZNFX1	NUP35
PDCD6		NUP37
PDE4B		OMD
PDE4D		OMG
PDE8A		OMP
PDGFRA		OOG1
PDGFRB		ORF19
PEX1		ORF61
PEX11B		OSCP1
PEX11C		OTT
PEX12		OTTMUSG0000
PEX14		OTUB1
PEX3		OTUB2
PEX5		OVCA2
PEX5L		PABPC2
PFKFB2		PABPN1L
PGAM5		PACS1
PGBD5		PACS2
PGK1-RS7		PACSIN1
PGLYRP2		PAF1
PHF2		PAFAH2
PHF23		PALM
PHF3		PALM2
PHF7		PAQR7
PHGDH		PBXIP1
PHIP		PCOLCE
PHKA1		PCSK1
PHKA2		PDE1C
PHYHD1		PDE3B
PHYHIP		PDE6B
PI15		PDHB
PI4K2A		PDHX
PIBF1		PDP1
PICALM		PDP2
PID1		PDPK1
PIF1		PDXP
PIGA		PDZD4
PIGB		PDZD8
PIGN		PDZRN3
PIGP		PGR15L
PIGT		PHACTR1
PIGV		PHACTR3
PITRM1		PHYHIPL
PKN3		PKIG
PKNOX1		PKN1
PLA2G6		PKNOX2
PLA2R1		PKP1
PLAG1		PKP2
PLK2		PKP3
PLK3		PKP4
PLK5		PLCB3
PLN		PLCB4
PLOD3		PLD3
PLP1		PLD4
PLP2		PLD5
PLRG1		PMF1
PLXDC1		PMFBP1
PLXNA2		PML
PLXNA3		PMP22
PLXNA4		PMPCA
PLXNB1		PMS2
PODNL1		PMVK
POLDIP3		PNPLA8
POLE3		PNPO
PPAPDC1B		PNPT1
PPAPDC2		POC1B
PPARA		POLD2
PPARD		POP5
PPBP		POP7
PPEF1		PPFIA1
PPIA		PPFIA2
PPID		PPFIA3
PPM1D		PPFIA4
PPM1H		PPFIBP1
PPM1K		PPFIBP2
PPM1L		PPIL5
PPM1M		PRDM8
PPP1CA		PRDX1
PPP1CB		PRDX2
PPP1R13B		PRDX6-RS1
PPP1R14C		PRF1
PPP1R14D		PRG3
PPP1R1C		PRG4
PPP1R2		PRICKLE1
PPP1R3C		PRKRA
PPP1R3D		PROC
PPP1R3F		PRODH
PPP2R2B		PROKR1
PPP2R5B		PROKR2
PPT1		PRPF38A
PPT2		PRPF40A
PRDM13		PRPF40B
PRDM14		PRRG4
PRDM15		PRSS22
PRDM16		PRSS34
PRDM2		PRSS35
PRDM4		PRSS40
PREP		PSAPL1
PREPL		PSMA5
PRICKLE2		PSMA6
PRID1		PSMA7
PRKAA1		PSMA8
PROS1		PSMB10
PROSAPIP1		PSMB5
PROX1		PSMC6
PROX2		PSMD3
PROZ		PSMD4
PRPF19		PSME4
PSD		PSMG2
PSD2		PTPRU
PSD3		PUS7
PSD4		RAB25
PSEN1		RAB2B
PSG16		RAB33A
PSG17		RAB33B
PSG19		RAB35
PSG20		RAB3GAP2
PSG22		RAB44
PSG23		RAB4A
PSG25		RABAC1
PSG26		RABGAP1L
PSG27		RABGEF1
PSG29		RABGGTA
PTCHD2		RABIF
PTH		RABL3
PTH2R		RABL5
PTK2		RAD52
PTK2B		RANGAP1
PTK6		RAP1GAP
PTK7		RAP1GAP2
PTMS		RAPGEF3
PTP4A2		RAPGEF4
PTPMT1		RAPH1
PVRL4		RARS
PVT1		RASA3
PWWP2A		RASA4
PYCR1		RASAL2
PYCRL		RASSF6
RAB3IP		RBMS3
RAB40C		RBMX2
RAD54B		RBP2
RAD54L2		RCAN3
RAI12		RCBTB1
RAI14		RDBP
RALB		RDH19
RALBP1		REXO1
RBM16		RFTN1
RBP1		RIPK4
RCOR3		RLF
REC8		RLIM
RECK		RMCS2
RECQL		RMI1
RECQL4		RNF121
RELL1		RNF128
REM1		RNF13
REPIN1		RNF135
REPS2		RNF220
RERE		RPL12
RERG		RPL23A
REST		RPL31
RET		RPL36
RFC4		RRS1
RFC5		RS1
RFFL		RSAD2
RFWD3		RSBN1
RFX6		RSBN1L
RFX7		RSC1A1
RG9MTD1		RSPO1
RG9MTD2		RTKN2
RG9MTD3		RUFY3
RGAG4		RUFY4
RGL1		RUNDC1
RGL3		SCG2
RING1		SCG5
RIPK2		SCN10A
RIPPLY3		SCN1A
RIT2		SCN2A1
RNF114		SCN2B
RNF115		SCN3A
RNF126		SCN3B
RNF144B		SCN4A
RNF145		SCN4B
RNF152		SCN5A
RNF20		SCN7A
RNF213		SCN8A
RNF214		SCN9A
RNF215		SCNN1B
RNF32		SCRN2
RNF4		SCT
RNF41		SDHB
RNF43		SDHC
RNF5		SEC16A
RNF6		SEC23IP
RNF7		SEMA3G
RNF8		SEMA4G
RNFT2		SEMA5A
ROBO2		SERPINB10
ROBO3		SETD4
ROBO4		SF3B1
ROGDI		SF4
ROR1		SFMBT1
ROR2		SFMBT2
RORA		SFRS4
RORB		SGCD
RORC		SGCE
ROS1		SGPL1
RP1		SH2D1A
RPAP2		SH2D1B1
RPL9		SH2D2A
RPRD1A		SH2D3C
RPRD1B		SH2D4A
RPRD2		SH2D4B
RPS10		SH2D5
RPS3		SLC22A12
RPS4X		SLC25A19
RPS6		SLC25A38
RPS6KA1		SLC25A39
RPS6KA2		SLC25A42
RSRC2		SLC27A3
RWDD3		SLC27A4
S100A1		SLC28A1
S100A16		SLC28A2
S100A3		SLC28A3
S100A4		SLC29A2
S100A6		SLC4A2
S100B		SLC4A3
S100PBP		SLC4A7
S1PR1		SLC4A8
S1PR2		SLC5A1
S1PR3		SLC5A12
S1PR5		SLC5A2
SAA1		SLC5A3
SAA2		SLC6A13
SAA4		SLC9A7
SACS		SLC9A8
SAE1		SLC9A9
SAMD4B		SLCO1A6
SAMD5		SLCO1B2
SARM1		SLCO2A1
SASH1		SLCO2B1
SASH3		SLCO3A1
SASS6		SLCO4A1
SATB1		SLCO4C1
SATB2		SLFN4
SBP		SLFN5
SCAI		SMGC
SCAMP1		SMNDC1
SCAMP2		SMO
SCAMP5		SMOC2
SCARF2		SMOK1
SCYL1		SMOK2A
SCYL3		SMOK4A
SDAD1		SMPD4
SDHD		SMPDL3A
SDK1		SNAI1
SDR16C6		SNCA
SDSL		SNCAIP
SEC14L4		SNCB
SEC22B		SND1
2018-09-15		SNED1
SERPINA3N		SNHG11
SERPINA5		SNIP1
SERPINA6		SNN
SERPINA7		SNORA65
SERPINB11		SNPH
SERPINB12		SNRPB
SERPINB1A		SOAT2
SERPINB1B		SORBS3
SERPINB1C		SORCS1
SERPINB2		SORCS2
SERPINB6A		SPEF1
SERPINB9E		SPSB2
SERPINB9F		SPSB3
SERPINB9G		SRP9
SERPINE1		SRPRB
SERPINE2		SRPX
SERPINF2		SRPX2
SERTAD3		SRRM1
SEZ6L2		SSR1
SF1		STAMBP
SFRP2		STARD13
SFRP4		STARD4
SGCZ		STARD6
SGIP1		STAT3
SGK2		STAT5A
SH3GL3		STAT6
SHBG		STC2
SHC2		STEAP2
SHC3		STEAP3
SHD		STEAP4
SHE		STIL
SHQ1		STIM2
SHROOM1		STK19
SHROOM2		STK25
SHROOM3		STOX2
SIPA1L1		STT3B
SIPA1L3		STX11
SIRPB1A		STX4A
SIRPB1B		STX8
SIX2		STXBP2
SKAP2		STXBP3A
SLC12A3		STXBP6
SLC12A4		STYX
SLC12A5		STYXL1
SLC12A7		SULT4A1
SLC12A8		SYNCRIP
SLC12A9		SYNPO
SLC13A3		SYS1
SLC13A5		SYT13
SLC15A2		SYT15
SLC15A4		TCERG1
SLC16A10		TCERG1L
SLC16A11		TCF24
SLC16A12		TCF25
SLC16A14		TCHHL1
SLC17A9		TCHP
SLC18A2		TCL1B1
SLC1A2		TCL1B2
SLC1A3		TCL1B3
SLC1A5		TCL1B5
SLC20A1		TDRD3
SLC20A2		TESB
SLC22A13		TEX10
SLC22A21		TEX16
SLC22A23		TEX19.1
SLC22A3		THA1
SLC22A5		THADA
SLC22A6		THBS1
SLC22A7		THBS2
SLC22A8		THBS3
SLC23A1		TIPARP
SLC23A2		TIPRL
SLC24A1		TJP2
SLC24A2		TKT
SLC24A3		TLCD2
SLC24A4		TLE4
SLC24A5		TMEM167B
SLC25A11		TMEM168
SLC25A25		TMEM169
SLC30A3		TMEM17
SLC30A5		TMEM170
SLC33A1		TMEM173
SLC34A1		TMEM178
SLC39A12		TMEM18
SLC4A4		TMEM183A
SLC5A4B		TMEM184A
SLC6A1		TMEM203
SLC6A14		TMOD3
SLC6A15		TMPRSS2
SLC6A17		TMPRSS3
SLC6A19		TMPRSS4
SLC6A2		TMPRSS5
SLC6A9		TMPRSS6
SLC7A10		TMTC4
SLC7A3		TMX1
SLC7A5		TMX3
SLC7A8		TMX4
SLIT1		TNC
SLITRK3		TNFAIP2
SLITRK5		TNFAIP3
SLITRK6		TNFAIP8L1
SLMAP		TNFAIP8L3
SMYD3		TOMM5
SMYD4		TOMM70A
SMYD5		TOMT
SPATA18		TOP2B
SPATA19		TOP3A
SPATA20		TOP3B
SPATA2L		TOPBP1
SPATA6		TOR1B
SPATA7		TOR3A
SPATA9		TOX
SPATS2		TPBPA
SPATS2L		TPCN1
SPG11		TPD52
SPG21		TPD52L1
SPG7		TPD52L2
SPHKAP		TPP2
SPIB		TPPP
SRD5A1		TPPP2
SRD5A3		TRIM28
SRF		TSR2
SRL		TTC21A
SRM		TUBB2A
SRP54A		TUBB2A-PS2
SRP54B		TUBB2B
SRP54C		TUBB2C
SRP72		TUBB2C-PS1
SRXN1		TUBB2C-PS2
SS18		TUBB3
SS18L1		TUBB3-PS1
SSB		TUBB4
SSBP2		TUBB5
SSBP3		TUBB6
SSFA2		TUBD1
SSH1		TXNRD3
SSH3		TYK2
SSNA1		TYMS
SSSCA1		TYRO3
SSTR4		TYRP1
SSTR5		UBA52
SSX2IP		UBA6
ST3GAL3		UBA7
ST3GAL4		UBAP1
ST6GAL1		UBE2R2
ST6GAL2		UBE2V1
STAC		UHRF1
STAC2		UHRF2
STAC3		UPF3A
STAG1		UPF3B
STAG2		UPK1B
STAR		UPK2
STARD3NL		UQCR10
STAT1		UQCRC2
STAU1		USHBP1
STEAP1		USP45
STK16		USP5
STK30		USP50
STK31		USP7
STK32A		VARS2
STK32C		VASH1
SULT1A1		VASN
SULT1D1		VPS35
SUMO2		VPS36
SUMO3		WASF1
SUN2		WASL
SUPT16H		WBP5
SUPT3H		WDR20A
SUSD4		WDR20B
SUV39H1		WDR46
SYCP3		WDR48
SYDE1		WDR59
SYKB		WDR61
SYN1		WDR62
SYN2		WDR70
SYN3		WDR72
SYNPO2L		WDR73
SYT3		WDR76
SYT8		WDR77
SYT9		WDR78
SZT2		WFDC3
TAB1		WIBG
TAF7		WIPF2
TAF8		WRNIP1
TAF9B		WSB1
TAGAP		WSB2
TAGAP1		XAB2
TAGLN2		XBP1
TAGLN3		XCR1
TAOK1		XIAP
TATDN3		XPA
TAX1BP1		XPC
TBC1D1		YIPF2
TBC1D10B		YIPF5
TBX19		YIPF6
TBX20		YKT6
TCEB3		YLPM1
TCFAP4		YPEL1
TCFEB		YPEL2
TCFEC		ZAP70
TCL1B4		ZDHHC3
TEDDM1		ZDHHC5
TES		ZDHHC7
TGFBI		ZMAT2
THOC7
THPO
TLR2
TLR3
TLR5
TLR7
TLX1
TM2D3
TM4SF1
TM4SF20
TMCO5
TMCO5B
TMCO6
TMEM107
TMEM111
TMEM117
TMEM119
TMEM121
TMEM127
TMEM129
TMEM130
TMEM131
TMEM132A
TMEM132C
TMEM132D
TMEM135
TMEM136
TMEM141
TMEM145
TMEM146
TMEM147
TMEM150B
TMEM150C
TMEM151A
TMEM151B
TMEM154
TMEM161B
TMEM165
TMEM176A
TMEM176B
TMEM211
TMEM214
TMEM217
TMEM230
TMEM233
TMEM38B
TMEM40
TMEM43
TMEM44
TMEM45A
TMEM47
TMEM48
TMEM54
TNNI1
TOMM40
TOMM40L
TPSB2
TRAF1
TRAF3
TRAF3IP1
TRAF3IP2
TRAF6
TRHDE
TRHR
TRIM69
TRIM7
TRIM71
TRPA1
TRPC3
TRPC4
TRPC4AP
TRPC5
TRPM5
TRPM6
TRPM7
TRPM8
TRPS1
TSC22D1
TSC22D2
[truncated: 194 more rows]
